# 1 Genomic signature of shifts in selection in a sub-alpine ant and its 2 physiological adaptations

3  
4 Cicconardi Francesco<sup>1</sup>, Krapf Patrick<sup>2</sup>, D'Annessa Ilda<sup>3</sup>, Gamisch Alexander<sup>2,4</sup>, Wagner  
5 Herbert C<sup>2</sup>, Nguyen Andrew D<sup>5</sup>, Economo Evan P<sup>6</sup>, Mikheyev Alexander S<sup>7</sup>, Guénard  
6 Benoit<sup>8</sup>, Grabherr Reingard<sup>9</sup>, Arthofer Wolfgang<sup>2</sup>, di Marino Daniele<sup>10</sup>, Steiner Florian  
7 M<sup>2</sup>, Schlick-Steiner Birgit C<sup>2</sup>

8

9 <sup>1</sup> Department of Zoology, University of Cambridge, Cambridge, UK

10 <sup>2</sup> Department of Ecology, University of Innsbruck, Innsbruck Austria

11 <sup>3</sup> Istituto di Chimica del Riconoscimento Molecolare, CNR (ICRM-CNR), Milan, Italy

12 <sup>4</sup> Department of Biosciences, University of Salzburg, Salzburg, Austria

13 <sup>5</sup> Department of Entomology and Nematology, University of Florida, USA

14 <sup>6</sup> Biodiversity & Biocomplexity Unit, Okinawa Institute of Science & Technology, Onna, Japan

15 <sup>7</sup> Ecology and Evolution Unit, Okinawa Institute of Science & Technology, Onna, Japan

16 <sup>8</sup> School of Biological Sciences, The University of Hong Kong, Hong Kong, China

17 <sup>9</sup> Institute of Biotechnology, University of Natural Resources and Life Sciences, Vienna, Austria

18 <sup>10</sup> Polytechnic University of Marche, Department of Life and Environmental Sciences, Ancona, Italy

19 Corresponding author: [francicco@gmail.com](mailto:francicco@gmail.com)

20

## 21 *Abstract*

22 Adaptation to climate can drive variation in diversification rates and species richness.  
23 Understanding how organisms adapt to extreme environments can therefore  
24 provide insightful case studies for both evolutionary biology and climate-change  
25 biology. Here, we take advantage of the vast diversity of lifestyles in ants to identify  
26 genomic signatures of adaptation to extreme habitats such as high altitude. We  
27 hypothesised two parallel patterns would occur in a genome adapting to an extreme  
28 habitat: *i*) strong positive selection on genes related to adaptation and, *ii*) a  
29 relaxation of previous purifying selection. We tested this hypothesis by sequencing  
30 the high-elevation specialist *Tetramorium alpestre* and four related species. In  
31 support of our hypothesis, we recorded a strong shift of selective forces in *T.*  
32 *alpestre*. We further disentangled candidate molecular adaptations in both gene  
33 expression and protein-coding sequence that were identified by our genome wide  
34 analyses. In particular, we demonstrate that *T. alpestre* has *i*) a derived level of  
35 expression for *stv* and other heat-shock proteins in chill shock tests, and *ii*)  
36 enzymatic enhancement of Hex-T1, a rate-limiting regulatory enzyme that controls  
37 the entry of glucose into the glycolytic pathway. Together, our analyses highlight the  
38 adaptive molecular changes that support colonisation of high altitude environments.

39

40

41

42

## 43 *Introduction*

44 Adaptation of organisms to climate drives variation in diversification rates and  
45 species richness among clades. Their climatic niche influences a species' occurrence  
46 in space and time (Soberón 2007) and thus is critically important for both speciation  
47 (e.g., ecological speciation through climatic niche divergence) and extinction (e.g.,  
48 due to climate change). Therefore, understanding how organisms manage thermal  
49 adaptation is important in terms of both evolutionary biology and climate-change  
50 biology, considering the potential world-wide loss of ecological niches (Lamprecht et  
51 al. 2018; Rogora et al. 2018). In this context, high elevations, characterized by a short  
52 growing season and low annual minimum and mean temperatures, with high daily  
53 fluctuation temperatures (Körner et al. 2011), are an important open-air laboratory  
54 to study speciation and adaptation to cold habitats; and compared to the great  
55 effort in gene-based studies on cold tolerance of model organisms, a lesser effort  
56 has been put towards understanding truly cold-tolerant animals at the genomic level  
57 (Clark and Worland 2008; Parker et al. 2018). This is even more evident when  
58 considering that among the approximately 600 sequenced insect genomes available  
59 today only four belong to species ecologically restricted to high altitudes or Antarctic  
60 habitats (Keeling et al. 2013; Kelley et al. 2014; Macdonald et al. 2016; Cicconardi et  
61 al. 2017a).

62 As yet, potential patterns of genomic signatures in organisms adapting to  
63 more extreme habitats, such as high elevations, have not been identified and, more  
64 generally, there is no theory that predicts the rates of genomic change for extreme  
65 habitats. Here, we hypothesise two parallel patterns to occur in a genome adapting  
66 to an extreme habitat. On the one hand, strong positive selection on genes related

67 to adaptation, such as genes involved in metabolic pathways, and on the other hand,  
68 a relaxation of previous selecting forces, as the conditions of the previous niche are  
69 lacking in the new niche. The latter should lead to a reduced number and/or a  
70 different set of genes under purifying selection. Specifically, in the case of high-  
71 elevation habitats, some heat-shock proteins (HSPs), necessary for coping with  
72 extreme heat, should be under relaxation, because heat resistance is not strongly  
73 selected for in the average alpine species. A problem with the hypothesis of these  
74 two parallel patterns is that there is no test available for the functional  
75 consequences of the loss or gain of a specific gene. There are often many pleiotropic  
76 effects for genes that make interpretations difficult, and HSPs, expressed upon  
77 exposure to stress or during development and growth, are likely to fall into this  
78 category. Therefore, we expect signatures of strong positive selection in metabolic  
79 genes, and an increase in the relaxation rates in other genes, without being able to  
80 specify which these might be. Identifying such genes will help to set up hypotheses  
81 to test in the future. A comparative approach offers the strongest method for testing  
82 our hypothesis, by comparing genomes of species closely related to each other, but  
83 divergent in terms of adaptation to different environments. However, this approach  
84 can be limited by insufficient niche divergence within a group or the number of  
85 genomes sequenced. Ants are emerging as a leading system for comparative  
86 genomics due to the constantly increasing number of available genomes. This  
87 resource offers the opportunity to improve the accuracy of orthology detection  
88 (Nygaard et al. 2016), to scan for specific mutations, candidate genes, and patterns  
89 of acceleration and relaxation in the ant genomes associated with adaptation to cold  
90 habitats.

91           Ants are key species in the Earth's terrestrial ecosystems. They comprise  
92 more than 15,442 described species and display an impressive diversity of lifestyles  
93 (Hölldobler and Wilson 1990; Bolton 2018; Seifert 2018). Ants are especially notable  
94 among insects for their ecological dominance as predators, scavengers, and indirect  
95 herbivores. They compose at least one third of the entire insect biomass (Wilson  
96 1990) and colonise all kinds of habitats, including thermobiologically challenging  
97 environments. The formicine ant *Melophorus bagoti*, for instance, is active during  
98 the hottest periods of the summer day, when air temperatures at ant height exceed  
99 50 °C (Christian and Morton 1992). On the other hand, for example, the myrmicine  
100 ant *Tetramorium alpestre* inhabits the montane and subalpine belt of the Central  
101 and South European mountain systems, with the Alps as its main distribution area  
102 (Wagner et al. 2017; Steiner et al. 2010). This species lives mainly between 1300 and  
103 2300 m above sea level (a.s.l.), forages below the ground, and nests are established  
104 in cool grassland under stones, in moss, rootage, and dead wood, especially  
105 subalpine and alpine grass mats (Seifert 2018). Since *T. alpestre* belongs to a species  
106 complex in which no relation between the ecological niche and worker morphology  
107 has been detected, searching for adaptive phenotypical differences outside of  
108 morphology, for example physiology, has already been suggested (Wagner et al.  
109 2017). This species is also relevant because, among the 79 Palearctic species of the  
110 worldwide distributed genus *Tetramorium* (Bolton 2016), it is one of only two  
111 species to form colonies with multiple queens (polygynous colonies), showing  
112 intermediate states of aggression and a transition from multicoloniality to  
113 supercoloniality (Krapf et al. 2018; Seifert 2018). *Tetramorium alpestre* is thus a

114 system well suited for studying both genomic adaptation to high elevation and socio-  
115 behavioural evolution.

116 Here, we tested our hypothesis of both increased diversifying and reduced  
117 purifying (relaxing) selection resulting from adaptation to an extreme niche using *T.*  
118 *alpestre*. We newly sequenced its genome and those of four related *Tetramorium*  
119 species with diverging ecological niches: *T. immigrans*, a species of the *T. caespitum*  
120 complex to which *T. alpestre* also belongs to, in sympatry with *T. alpestre*, but  
121 distinct in its altitudinal and ecological habitat; *T. parvispinum*, restricted to  
122 mountain forest habitats of the Austral-Asian and Indo-Malayan subregions (Liu et  
123 al. 2015); and *T. bicarinatum* and *T. simillimum*, invasive generalist species which  
124 occur in warmer habitats (Bertelsmeier et al. 2017; Guénard et al. 2017). Our goals  
125 were to define the ecological niche of these ant species based on environmental  
126 data, and subsequently to perform gene family expansion/contraction and protein-  
127 coding scans for signatures of diversifying and relaxing selection. We also annotated  
128 the five HSP subfamilies for 19 ant species to test for possible shifts in selection  
129 acting on these gene families. Among the signatures of diversifying selection  
130 detected, we performed two experiments in *T. alpestre* and its relative, *T.*  
131 *immigrans*: we assessed (i) chill-shock triggered gene-expression patterns of *starvin*  
132 (*stv*), a Hsp70 modulator, and certain HSPs involved in recovering from extreme cold,  
133 and (ii) the temperature dependence of the enzyme activity of Hexokinase type 1  
134 (Hex-T1), a rate-limiting and regulatory enzyme that controls the entry of glucose  
135 into the glycolytic pathway, one of the most conserved and essential hexokinase  
136 isoenzymes (Jayakumar et al. 2007). The genomic data presented here contribute to

137 a foundation for studying insect genome evolution, particularly also in the light of  
 138 climate change.

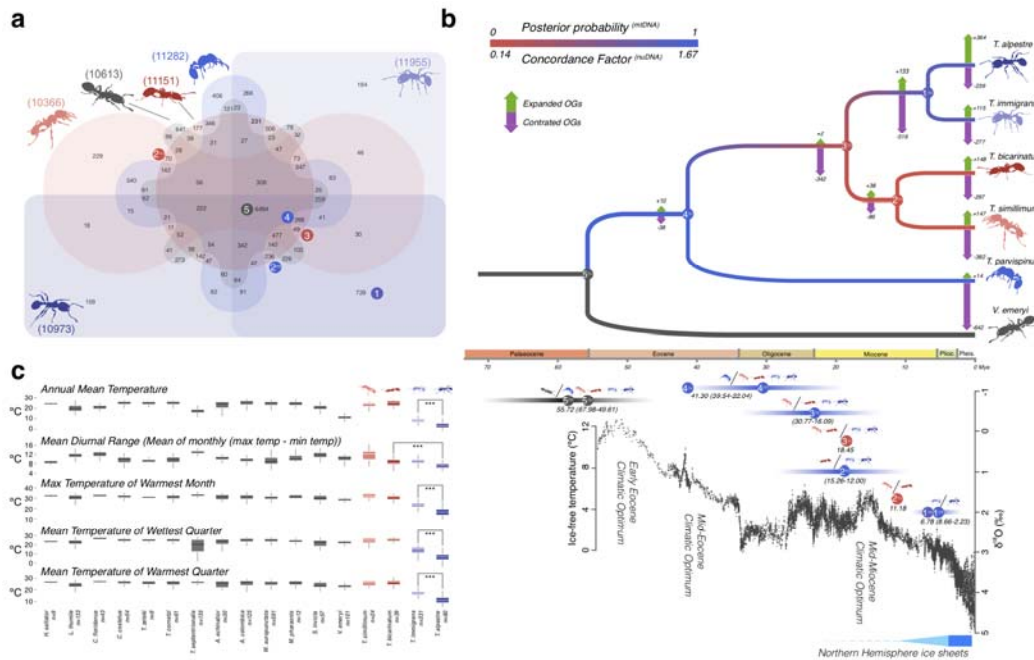

139

140 **Figure 1.** a) Venn diagram displaying overlap in orthologous genes in the five *Tetramorium* spp. + *V. emeryi*  
 141 (Crematogastrini). Coloured circles with number represent phylogenetic splits in the nuDNA ( $N^u$ ) and  
 142 mitochondrial phylogenies in *b*; b) The dated Crematogastrini nuclear phylogeny (above). Branch colour are  
 143 based on the concordance factors of the two datasets (nuDNA and mtDNA). On each branch, the numbers of  
 144 expanded (green arrows) or contracted (purple arrows) genes is shown, inferred from observed OGs sizes at  
 145 terminal branches. In the bottom, the global  $\delta^{18}\text{O}$  (‰) derived from analyses of two common and long-lived  
 146 benthic taxa are given, *Cibicidoides* and *Nuttallides*, which reflect the global deep-sea oxygen and carbon isotope  
 147 and thus the temperature (from Zachos et al., 2001). Bars represent the 95% confidence interval for the BI  
 148 analysis, circles with numbers the phylogenetic splits in the nuDNA ( $N^u$ ) and mtDNA ( $N^m$ ) phylogenies. c)  
 149 Boxplots of the five bioclimatic variables significantly different for *T. alpestre* and the other ant species.

150

## 151 **Results**

### 152 **Climatic niches**

153 A dataset contains 1835 localities representing 17 species was assembled, with the  
 154 number of localities per species ranging from 9 to 591 (Table S1). Of the 19  
 155 bioclimatic variables, four (bio1: Annual Mean Temperature, bio5: Max Temperature  
 156 of Warmest Month, bio8: Mean Temperature of Wettest Quarter, bio10: Mean  
 157 Temperature of Warmest Quarter) differentiated between *T. alpestre* and other ants

158 (adjusted  $P$ -values < 0.001) (Figure 1a). In detail, *T. immigrans* and *T. alpestre* occupy  
159 habitats that are colder in the growing season than those of the remaining species,  
160 with *T. alpestre* revealing even colder habitats compared with *T. immigrans*.

161

## 162 **Sequencing, assembly, and annotation of the *Tetramorium* genomes**

163 The combination of overlapping paired-end libraries with very high coverage,  
164 standard short paired-end libraries, and mate pair libraries resulted in an overall  
165 complete assembly of the five *de novo Tetramorium* genomes, at the level of both  
166 contiguity and scaffolding. In particular, the *T. alpestre* genome contiguity (contig  
167 N50) is the 3<sup>rd</sup> best among all ant genomes available (Table S2). The analysis of the  $k$ -  
168 mer frequency distribution generated was unimodal (Figure S1; Supplementary  
169 Material online), and an analysis of the distribution of GC content across the five *de*  
170 *novo Tetramorium* genomes revealed similar distributions with a mean of 38%, that  
171 is, slightly less than that found in *V. emeryi* (42%) (Figure S2). No significant bias was  
172 recovered considering GC content and coverage (Figure S3). All five *de novo* draft  
173 assemblies were ~241 Mb in length, comparable in size with the average of all ant  
174 genomes available (~278 Mb) (Table S2). The total *T. alpestre* genome size was  
175 245.72 Mb, including 18 Mb of gaps and unknown characters (N/X), slightly smaller  
176 than the estimated genome size by flow-cytometry of 291.84 Mb +/- 1.76 Mb (n=12).  
177 Repetitive elements made up similar proportions of each sequenced genome (*T.*  
178 *alpestre* = 18%, *T. immigrans* = 20%, *T. bicarinatum* = 21%, *T. simillimum* = 20%,  
179 *T. parvispinum* = 23%; Table S2), indicating a strong correlation between genome  
180 size and total interspersed repeat content (Pearson  $\rho$  = 0.976,  $P$ -value < 0.005; Figure  
181 S5). For the gene annotations in *T. alpestre*, a combinatorial approach of

182 unsupervised RNA-seq-based, homology-based, *ab initio*, and finally *de novo*  
183 methods were used. By doing so, we approached the number of predicted protein-  
184 coding genes in the phylogenetically closest annotated species (15,085 genes  
185 predicted vs. 14,872 in the *V. emeryi* genome, Table S2). This improved the  
186 homology-based annotation of the remaining four *Tetramorium* genome assemblies  
187 that did not differ much in terms of estimated gene content, ranging from 16k to 15k  
188 annotated loci (Table S2). BUSCO analyses estimated overall good representation,  
189 with recovered genes in between the 97.6% and 99.9% (Table S2; Figure S6), and all  
190 statistics on mRNA, coding regions (CDS), exon, and intron length gave highly similar  
191 and overlapping distributions among all *Tetramorium* species and *D. melanogaster*  
192 as a reference (Figure S7). Also, the transcript completeness gave good results with a  
193 comparable distribution of percentage of alignment across species (Figure S8).

194         The orthology search analysis produced a total of 7195 OGs between *D.*  
195 *melanogaster* and Hymenoptera; 3261 of these represented scOGs present in all 22  
196 species analysed. Restricting the orthology analysis to *Tetramorium* spp. and *V.*  
197 *emeryi* resulted in 6494 OGs; among *Tetramorium*, the highest fraction was  
198 recovered between *T. alpestre* and *T. immigrans* with 729 OGs, followed by *T.*  
199 *simillimum* and *T. parvispinum* (540 OGs) (Figure 1a). For all *Tetramorium* species.,  
200 the fraction of orthologous genes with at least a match with one of the three  
201 outgroups (*A. mellifera*, *N. vitripennis*, *D. melanogaster*) was on average 7286, with  
202 the highest in *T. alpestre* (7879) and the lowest in *T. parvispinum* (6977), in line with  
203 the average value found in ants (7831).

204

205 **Assembly and annotation of ant mitogenomes and their gene translocations**



206 We assembled complete mtDNA genome sequences from 24 ant species. Because of  
207 the differences among SRA datasets, we used different numbers of reads to  
208 assemble the complete sequences. The new mtDNA genomes were slightly longer  
209 (on average, 17k vs. 16k; Table S2), probably due to the reconstruction of the D-loop  
210 and ribosomal genes, which are sometimes harder to assemble. We slightly mis-  
211 assembled a coding gene (*nad2*) in the *T. bicarinatum* genome and a few other tRNA  
212 loci in other genomes (Table S2). The average GC-content for coding genes was 23.9  
213  $\pm$  3.0% and varied slightly among taxa with the lowest in *Formica fusca* (19.0%) and  
214 the highest in *Leptomyrmex pallens* (32.8%) (Table S2). While almost all species had  
215 the typical gene order and orientation, some rearrangements were observed. All  
216 myrmicine ants were characterized by a translocation of *trnV* after *rrnS*; *Solenopsis*  
217 spp. had a swapped position of *rrnS* and *trnN*; *Monomorium pharaonis* had at least  
218 three rearrangements: the inversion of *nad6*, *cob*, and *trnS2*, the translocation of  
219 *trnE* upstream to *trnA*, and the translocation of *trnR* upstream to *trnE*; *Tetramorium*  
220 spp. underwent a swap of *trnR* and *trnN* (Figure S9).

221

222 **Phylogenetic analyses of *Tetramorium* spp., their diversification dating, and the**  
223 **Miocene-Pliocene origin of the lineage leading to *T. alpestre***

224 The estimated divergence ages from both datasets (mtDNA, nuDNA) were congruent  
225 for most nodes, except for recent nodes within the Attini (Figure 1b; Figure S10-13).  
226 In this case, the penalized likelihood approach estimates were always more recent  
227 than the estimations made with BI using BEAST. The dating of basal nodes like the  
228 MRCA (e.g., Crematogastrini, Myrmicinae, and Formicinae) were congruent with a  
229 previous analysis based on more taxa but fewer genes (Moreau and Bell 2013). The

230 two methods also converged regarding the date of the most recent common  
231 ancestor (MRCA) between *T. alpestre* and *T. immigrans*. In that specific case, PL  
232 dated that split at 6.8 million years ago (mya) within the confidence interval given by  
233 BI (Median: 5.15 mya; 95% HPD: 2.66, 8.23).

234 The phylogenetic relationships were generally highly congruent and with  
235 predominantly strong support (Figure 1b and Figures S10-13). In the ML phylogeny  
236 of scOGs (nuDNA), all nodes were supported with a bootstrap value of 1. Across the  
237 whole phylogeny, only a few nodes had weak signals, resulting in very few  
238 topological disagreements and low coalescent units (CU). Within the clade of  
239 Crematogastrini (*Tetramorium* spp. + *V. emeryi*), the relation of *T. bicarinatum* and *T.*  
240 *simillimum* was uncertain: nuDNA phylogeny recovered them as sister species with  
241 low CU (0.11), while mtDNA phylogeny placed *T. bicarinatum* as sister to the *T.*  
242 *alpestre-T. immigrans* cluster, with a bootstrap value of 0.77 and a posterior  
243 probability of 0.99.

244

245 **Contractions of OGs in the *T. immigrans* and *T. alpestre* lineages and expansion of**  
246 **retrotransposon-related genes in *T. alpestre***

247 We examined the evolutionary dynamics of OGs looking at more dynamic ranges  
248 corresponding with terminal branches. We observed an increased number of OG  
249 deaths in the *T. parvispinum* lineage (– 642) and in the lineage leading to *T. alpestre*  
250 and *T. immigrans* (– 516). Ortholog groups showed very little expansion in internal  
251 branches of the *Tetramorium* radiation. Expanded OGs were common in terminal  
252 branches, except for *T. parvispinum* with very few expanded OGs (+ 14), suggesting a  
253 possible lack of annotation. *Tetramorium alpestre* showed the highest number of

254 expanded OGs (+ 364) (Figure 1b), with more than 370 of them (~ 40%) belonging to  
255 genes with reverse transcriptase (PFAM: rve, rve\_1, rve\_2) or transposase and  
256 retrotransposon activities (PFAM: Retrotrans\_gag, Retrotran\_gag\_2). Among other  
257 PFAM, haemolymph juvenile hormone-binding proteins (PFAM: JHBP; 20 genes), zinc  
258 fingers (PFAM: zf-CCHC, zf-H2C2, zf-met, 32 genes), and sugar transporters (PFAM:  
259 Sugar\_tr, 4 genes) were found.

260

### 261 **Dual signature of evolutionary pressures in single-copy OGs in the *T. alpestre*** 262 **genome**

263 We investigated the impact of evolutionary pressures on one-to-one orthology in the  
264 five *Tetramorium* spp. and 14 other ant species and three outgroups (*Apis mellifera*,  
265 *Nasonia vitripennis*, and *Drosophila melanogaster*) by computing both mean  $\omega$   
266 ( $d_N/d_S$ ) for terminal branches and relaxing selection ( $k$ ) within the Crematogastrini.

267 The measure of the mean branch  $\omega$  showed an overall high level of purifying  
268 selection along the whole ant phylogeny, including for short branches (Roux et al.  
269 2014; Cicconardi et al. 2017b), with median values of 0.10. However, this distribution  
270 was significantly shifted in *T. alpestre*, which showed a median value of 0.38  
271 (Wilcoxon rank-sum test 'greater',  $P$ -value  $< 2.2e^{-16}$ ), whilst keeping the proportion  
272 of  $\omega > 1$  in each branch unchanged (Figure 2a, S13). The evaluation of  $k$  in the five  
273 *Tetramorium* spp. and *V. emeryi* had a mean of median values of 0.99, that is, twice  
274 the value in *T. alpestre* (median  $k = 0.47$ ; Wilcoxon rank-sum test 'less',  $P$ -value  $<$   
275  $2.2e^{-16}$ ) (Figure 2b). We investigated the nature of the increased  $\omega$  (episodic  
276 diversifying selection) and decreased  $k$  (relaxed selection) in *T. alpestre* by combining  
277 the two measures. Two evolutionary trajectories appeared to act simultaneously

278 (two tails of the distribution, Figure 2c): One trajectory seems to have led to episodic  
 279 diversifying selection,

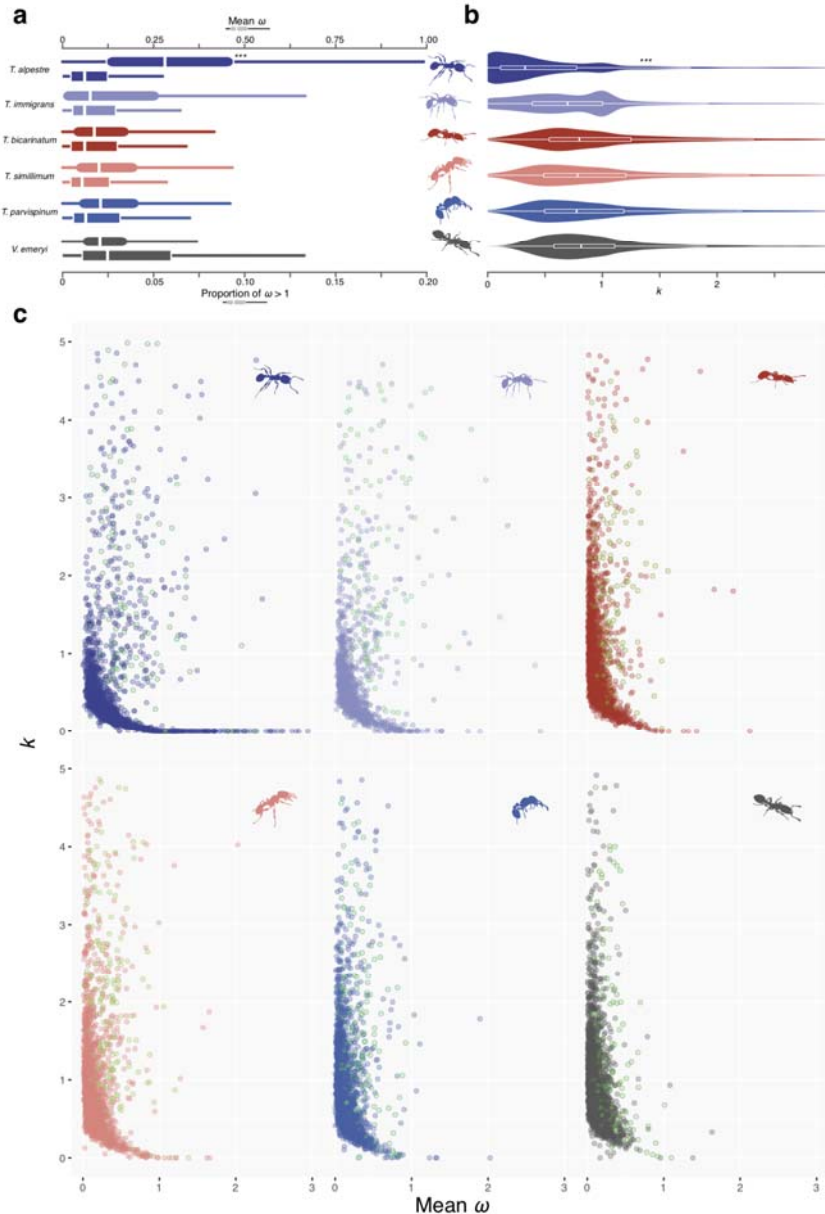

280  
 281 **Figure 2.** a) Boxplots showing the distribution and median (vertical line) of mean  $\omega$  ( $d_N/d_S$ ) rates (square shapes)  
 282 in terminal branches of *Tetramorium* spp. and *V. emeryi* (Crematogastrini) in scOGs, and the proportion of genes  
 283 for which  $\omega$  is higher than one. b) Boxplots overlapped by violin plots showing the distribution of  $k$  in  
 284 Crematogastrini. The distribution in *T. alpestre* is clearly bimodal as in *T. immigrans*, but with a much more  
 285 skewed distribution towards zero values. In both sections, asterisks indicate the degree of significance between  
 286 *T. alpestre* and the other species (Wilcoxon rank-sum tests). c) Scatter plots for each Crematogastrini species  
 287 included, showing for each scOG branch both values of  $\omega$  and  $k$ . The green dots are scOGs with uncorrected  $P$ -  
 288 values associated with diversifying selection less than 0.05. The distribution in *T. alpestre* shows the longest tail

289 corresponding to very low values of  $k$  and high values of  $\omega$ . It is also notable a much wider and scattered  
 290 distribution of scOGs with high  $k$  and  $\omega$  compared with all other species.  
 291  
 292 promoting the fixation of nonsynonymous mutations with presumably advantageous  
 293 fitness effects for genes with increased values of  $\omega$  and  $k$ , also present in the other  
 294 species. The other trajectory showed a relaxation of the overall purifying selection in  
 295 genes with increased values of  $\omega$  and decreased values of  $k$ , only mildly present in *T.*  
 296 *immigrans*.

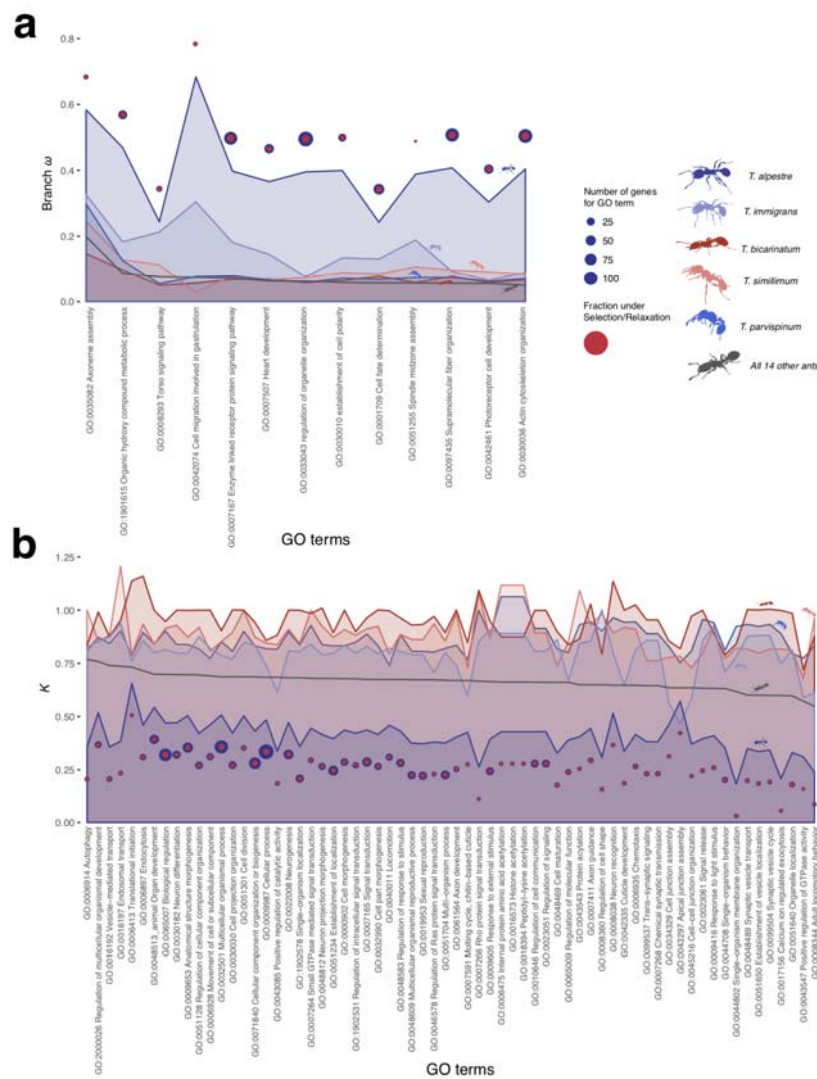

297 **Figure 3.** For each enriched Gene Ontology (GO) term category *a*) the median values of  $\omega$ ; and *b*)  $k$  for genes  
 298 enriching the specific category. *Tetramorium* spp. are colour coded, the other 14 species, merged to obtain a  
 299 background signal, are in gray. Blue circles are scOGs tested for each GO term, red circles are scOGs returned as  
 300 significant. Circle sizes are proportional to the number of genes. To be noted are the overall extremely higher

301 values of  $\omega$  and lower values of  $k$  in *T. alpestre* branches compared to the other species. Seldomly also *T.*  
302 *immigrans* shows few GO terms with high  $\omega$  and low  $k$  values, in particular the Apical junction assembly  
303 (GO:0043297) shows an inverted trend between *T. alpestre* and *T. immigrans*.

304

305           After a stringent correction for multiple testing, we found 175 scOGs with a  
306 putative signature of diversifying selection (adjusted  $P$ -values < 0.005; Table S5),  
307 with 50 genes enriching 13 biological process terms ( $P$ -values < 0.005; Figure 3a,  
308 Table S6), nine related to cell development (e.g., cell migration involved in  
309 gastrulation, photoreceptor cell development, cell fate determination) and  
310 organization (e.g., regulation of organelle organization), two related to signalling  
311 pathways (enzyme linked receptor protein signalling pathway and torso signalling  
312 pathway), one to heart development, and one to organic hydroxy-compound  
313 metabolic processes. The most representative genes were *Pten* and *Gbeta13F*,  
314 involved in six biological processes, *DCTN1-p150* and *dsh*, involved in five of them. All  
315 key genes are involved in the proliferation and division of cells, especially  
316 neurological stem cells (*Gbeta13F*), respiratory system development (*Pten* and *dsh*),  
317 and the serine/threonine-protein kinase *polo*, present in four enriched Gene  
318 Ontology (GO) terms. In the catalytic domain of this protein (255 aa), we found five  
319 amino acid substitutions compared with *T. immigrans*, three of them corresponding  
320 to active sites (*TalpPolo<sub>G29V</sub>*, *TalpPolo<sub>G30R</sub>*, *TalpPolo<sub>S104R</sub>*). We also tested for possible  
321 enrichment in KEGG pathways and found three significant pathways ( $P$ -values < 0.02;  
322 Table S7), all involved in the metabolic processes of galactose metabolism and the  
323 glycolysis pathway, the pentose phosphate pathway, and galactose metabolism, with  
324 five enzymes under diversifying selection: a glucose-6-phosphate (*CG9008*), the  
325 hexokinase type 1 (*Hex-T1*), a phosphofructokinase (*Pfk*), a transketolase (*CG8036*),  
326 and a phosphoglucosemutase (*pgm*).

327           132 scOGs had a signature of putative relaxation ( $P$ -values  $< 0.005$ ; Table S8).  
328 While the absolute number of scOGs under relaxation was slightly lower than the  
329 number of genes under diversifying selection, the gene-set enrichment tests  
330 revealed many more biological processes significantly enriched: 70 terms ( $P$ -values  $<$   
331  $0.005$ ; Figure 3b, Table S9) enriched by 118 genes. Fifteen terms were related to the  
332 regulation of cellular development, signal transduction, and cell communication  
333 (e.g., regulation of response to stimuli, regulation of cell communication, regulation  
334 of Ras signal transduction), 12 terms related to neurogenesis, axon development,  
335 and synaptic transmission (e.g., neuron differentiation, trans-synaptic signalling,  
336 axon guidance), seven terms were related to cell morphogenesis and junction  
337 organization, and many other related to response to stimuli (e.g., chemotaxis,  
338 response to light) or related to adult development and morphogenesis (e.g.,  
339 anatomical structure morphogenesis, molting cycle, chitin-based cuticle). The  
340 enrichment of KEGG pathways revealed three pathways: mRNA surveillance  
341 pathway, spliceosome, and protein processing in endoplasmic reticulum ( $P$ -values  $<$   
342  $0.05$ ; Table S10).

343

344 **The Hex-T1 activity, its model structure, and molecular dynamics simulations in *T.***  
345 ***alpestre* and *T. immigrans***

346 As we describe in the previous section, the enrichment for KEGG pathways led to the  
347 identification of three metabolic pathways, all involved in the metabolism of sugars,  
348 with five genes under selection. We therefore aimed at the experimental validation  
349 of their functionalities comparing their activity in *T. alpestre* and the most closely  
350 related species in this dataset, *T. immigrans*. We tried to assay the four enzymes, but

351 unfortunately, we were able to correctly synthesise only Hex-T1. The assay was  
352 designed to measure the efficiency of Hex-T1 in both species and in a temperature  
353 gradient, at 6, 16, 26, and 36 °C. The assays showed that the Km value was always

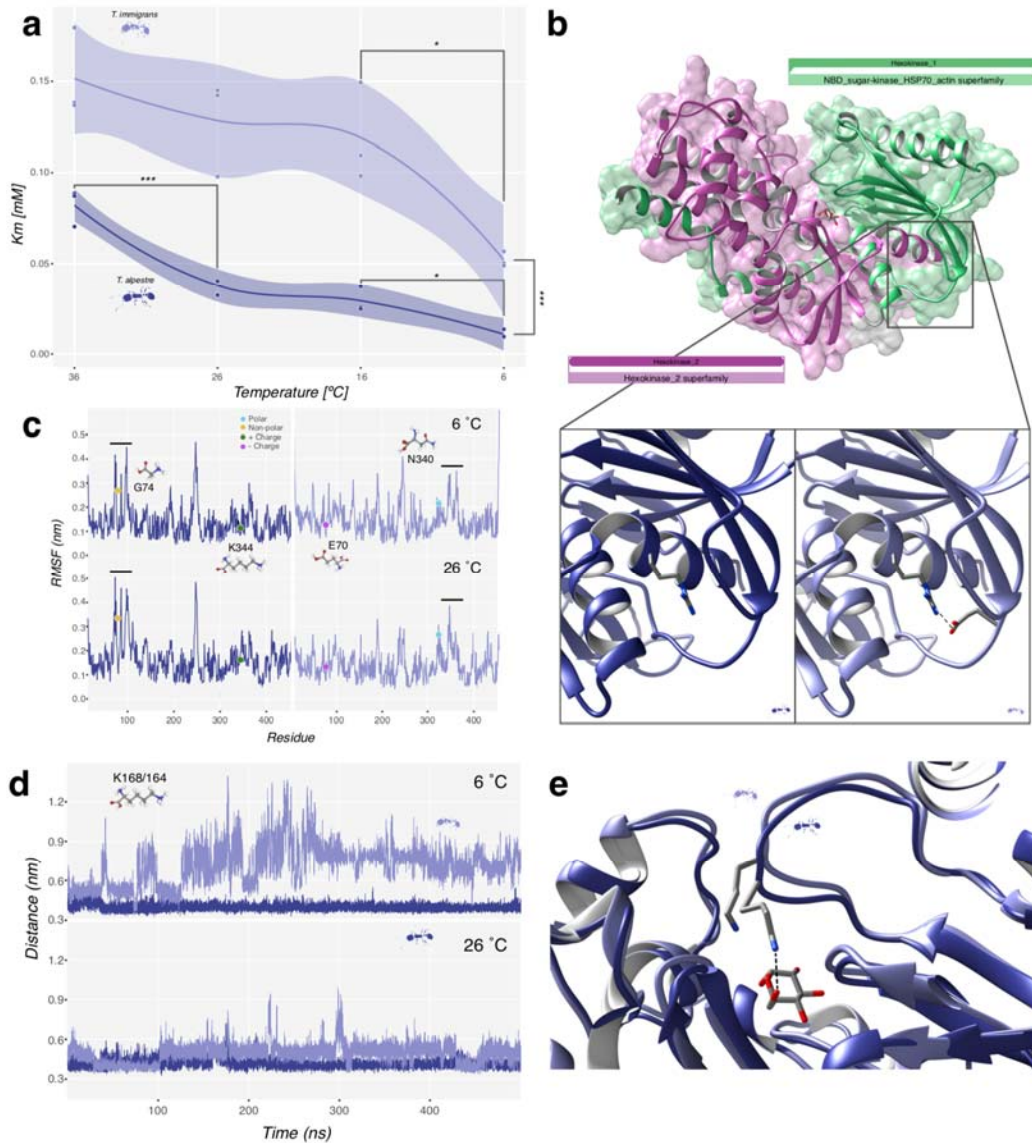

354  
355 **Figure 4.** a) Scatter plot of Km score across the temperature gradient in the two species, *T. immigrans* on top and  
356 *T. alpestre* on the bottom. Lines represent average values with confidence intervals. Significances: \*\*\* < 0.001;  
357 \*\* < 0.001; \* < 0.05. b) Overview of the homology-modeled structure of Hex-T1 in *T. alpestre* showing the two  
358 Hexokinase domains, PFAM00349 (green) and PFAM03727 (pink). The lower panels show the location of TalpHex-  
359 T1<sub>G74</sub> (left) and TimmHex-T1<sub>E70</sub> (right) as well as the arginine residue that forms a salt bridge with E70 (dashed  
360 line). c) Per-Residue Root Mean Square Fluctuation (RMSF) calculated along 500 ns trajectories carried out at 6 °C  
361 (upper panel) and 26 °C (lower panel) for TalpHex-T1 (left panel, blue line) and TimmHex-T1 (right panel, light  
362 blue line). The location of the residues found mutated between the two sequences are indicated. d) Time  
363 evolution of the atomic distance between the centre of mass of glucose and the lateral chain nitrogen atom of  
364 TalpHex-T1<sub>K168</sub> (blue line) and TimmHex-T1<sub>K164</sub> (light blue line) in the binding pocket calculated along the 500 ns  
365 trajectories carried out at 6 °C (upper panel) and 26 °C (lower panel). e) Representative configurations extracted



366 from the simulations at 26 °C showing the different orientation of TalpHex-T1<sub>K168</sub> and TimmHex-T1<sub>K164</sub>, with the  
367 first one being the only one able to bind the glucose (dashed line).  
368

369 lower in *T. alpestre* than in *T. immigrans* (Wilcoxon rank-sum test 'less', *P*-value <  
370 0.00004, Figure 4a), with values ranging from 0.08 mM to 0.01 mM in *T. alpestre*  
371 versus 0.15 mM to 0.05 mM in *T. immigrans*, from the highest to the lowest  
372 temperature; reflecting that less substrate concentration was needed for the *T.*  
373 *alpestre* enzyme to reach half of its maximal reaction speed, that is, Hex-T1 of *T.*  
374 *alpestre* was always more efficient than of *T. immigrans*. Although the number of  
375 replicates per condition was small, we performed statistical tests to attempt  
376 obtaining insight in the enzymatic activity differences within species at different  
377 temperatures and in their variance. Interestingly, it seems that for both species  
378 there is an improvement in the Km values shifting towards the lowest temperatures  
379 (6 °C vs 16 °C; two-way ANOVA followed by a Tukey's multiple comparison; adjusted  
380 *P*-values < 0.05), and a possible deterioration at higher temperatures in *T. alpestre*,  
381 from 0.04±0.01 mM (26 °C) to 0.08±0.01 mM (36 °C) (two-way ANOVA followed by a  
382 Tukey's multiple comparison; adjusted *P*-value < 0.0002). An F test (VAR.TEST()  
383 implemented in R) to compare the variances of the enzymatic activities (Km values)  
384 between the two species – by pooling the replicates at 16 and 26 °C – suggested that  
385 there is a possible significant difference in their variance (*P*-value = 0.015), with the  
386 confidence interval of Hex-T1 activity in *T. immigrans* twice wider as in *T. alpestre*.

387         The Hex-T1 enzyme is made of two structurally similar domains, Hexokinase 1  
388 and 2 (PFAM00349 and PFAM03727), and an N-terminus that is highly variable both in  
389 terms of length and amino acidic composition (Figure 4b). The two domains are  
390 relatively well conserved across all ants, other Hymenoptera and *D. melanogaster*.

391 Excluding the hypervariable N-terminus, and considering the two functional  
392 domains, the amino acid sequences of *T. alpestre* and *T. immigrans* only differ by  
393 two amino-acidic changes: a glutamic acid (E) replaced by a glycine (G) in position 74  
394 (TalpHex-T1<sub>E74G</sub>) (Figure 4b inserts) and an asparagine (N) replaced by a lysine (K) in  
395 position 344 (TalpHex-T1<sub>N344K</sub>). While the second change probably does not entail a  
396 significant functionality effect, the *TalpHex-T1<sub>E74G</sub>* instead may be significant.  
397 Because of the lack of the long chain and the negative charge, this modification  
398 could give the protein a higher flexibility and therefore an overall higher kinetics. We  
399 tested this hypothesis by simulating the protein dynamics in the presence of the  
400 glucose substrate at different temperatures, i.e. 6 and 26 °C, with the intent of  
401 mirroring the condition in the in vitro assay. In the simulations we can see a dual  
402 effect. For TalpHex-T1<sub>N344K</sub>, located at the C-terminal of an  $\alpha$ -helix forming a helix-  
403 turn-helix motif (VSETEKDPKG), the Root Mean Square Fluctuation (RMSF) revealed  
404 a lower degree of fluctuation in TalpHex-T1 (Figure 4c). This is possibly due to the  
405 alternation of positive and negative charges creates a salt-bridges network that  
406 stabilizes the whole motif (data not shown). In particular TalpHex-T1<sub>K344</sub> is involved  
407 in a stable interaction with TalpHex-T1<sub>E341</sub> (data not shown), while TimmHex-T1<sub>N340</sub> is  
408 not available for the formation of salt bridges and mainly establishes hydrogen  
409 bonds with TimmHex-T1<sub>S336</sub> or TimmHex-T1<sub>E337</sub> at 6 or 26 °C, respectively. Although  
410 the *T. alpestre* salt bridge brings a higher flexibility of the helix-turn-helix motive, it  
411 does not interfere with the catalytic site, given that this motif is far away in the C-  
412 terminal region of the protein.

413 In contrast, at the other region (TalpHex-T1<sub>E74G</sub>), the mutation-caused amino  
414 acid change allows the loop to explore a broader conformational space equipping it

415 with a higher degree of flexibility already at 6 °C (Figure 4c). Nevertheless, by  
416 increasing the temperature, TalpHex-T1 was subjected to an even higher degree of  
417 fluctuation, once again confirming the intrinsic flexibility led by the glycine. Notably,  
418 the increased flexibility is also transferred to residues relatively far from the  
419 mutation, in particular in regions near the active site (168-169), causing a different  
420 pattern of interaction with the substrate (Figure 4d, e). Indeed, TalpHex-T1  
421 established a stronger interaction with glucose at both temperatures with respect to  
422 TimmHex-T1 (Figure 4e).

423

#### 424 **The heat-shock proteins in ants and their evolution in *T. alpestre***

425 Members of the five subfamilies of the heat shock proteins (HSPs: Hsp90s, Hsp70s,  
426 Hsp60s, Hsp40s, and sHsps) were fully recovered and characterized in 19 ant species.  
427 Overall, a strong purifying selection was observed within subfamilies (Figure 5a,  
428 Table S11). In the Hsp90 gene family (*trap1*, *gp93*, and *Hsp83*) *Hsp83* was found  
429 duplicated within the lineage of *W. auropunctata* (inparalog), as well as the *T.*  
430 *parvispinum* *gp93*; duplication that probably occurred before emergence of the  
431 lineage (outparalog) (Figure S14). Members of the Hsp70 family were recovered for  
432 all species with 11 ortholog groups, with few duplications in *Hsc70-3* and *Hsc70-5*  
433 (two inparalogs and two outparalogs, respectively). We confirmed the lack of Hsp70s  
434 in ants (Nguyen et al. 2016) and a multiple duplication of *Hsc70-4* in Hymenoptera.  
435 One paralog seemed to be lost in many species while the other two copies were still  
436 present in almost all species, with the presence of other outparalogs in various  
437 species, mostly in Attini (Figure S15). The chaperonin Cpn60/TCP-1 family (Hsp60)  
438 had nine OGs; six inparalogs were found in *CCT7*, *CCT3* and four outparalogs in

439 *Tcp1a*, *CCT8*. The heat shock protein 40 kDa/Chaperone DnaJ was the largest  
440 subfamily, with 37 well-defined OGs. Its turnover of duplication was relatively small,  
441 and only six OGs showed some level of duplication. The small HSPs (sHsps) showed  
442 the expansion of the lethal (2) essential for life (*l(2)efl*) gene paralog of *D.*  
443 *melanogaster*, with five distinct OGs in all Hymenoptera. *L(2)efl3* seemed to be  
444 retained by only in 11 species, and with *l(2)efl4*, they are the two most divergent  
445 OGs, with  $\omega$  equal to 0.23 and 0.33, respectively. The less divergent were *Hspb1* and  
446 *l(2)efl5*, for which  $\omega$  was 0.11 and 0.07, respectively. Overall, the sHsps showed a  
447 significantly higher distribution of  $\omega$  (median = 0.22,  $P$ -value = 0.013), followed by  
448 Hsp40s, which also showed a wide distribution of  $\omega$ . In contrast, Hsp90s, Hsp70s,  
449 and Hsp60s seemed to be very stable and under a very high purifying selection.

450 To understand other possible mechanisms of adaptation of *T. alpestre* to the  
451 cold, we computed the mean values of  $\omega$  and  $k$  for all branches leading to  
452 *Tetramorium* spp. and *V. emeryi*, integrating 13 ant species, and scanned for  
453 diversifying and relaxed selection specifically in *T. alpestre*. The first part of the  
454 analysis showed a similar landscape as observed in scOGs. Among the five  
455 *Tetramorium* species and *V. emeryi*, five species display a distribution of the mean-  
456 branch  $\omega$  ranging between 0.07 (*T. immigrans*) and 0.13 (*T. parvispinum*); *T. alpestre*  
457 instead showed significant 2.7-fold higher value of the median mean-branch  $\omega$  ( $\omega$  =  
458 0.36, Wilcoxon rank-sum test 'greater', adjusted  $P$ -values < 0.004, Figure 5b). The  
459 distribution of  $k$  among HSPs in the six species showed median values of  $k$  all close to  
460 the expected ( $k = 1$ ), between 0.90 in *V. emeryi* and 1.05 in *T. simillimum*, again with  
461 the exception of *T. alpestre*, where the median  $k = 0.63$ , 1.4-fold lower than the  
462 lowest median  $k$  (Wilcoxon rank-sum test 'less', adjusted  $P$ -values < 0.05, Figure 5c).

463 The scan for diversifying positive and relaxed selection in branches of the HSPs of *T.*

464 *alpestre*

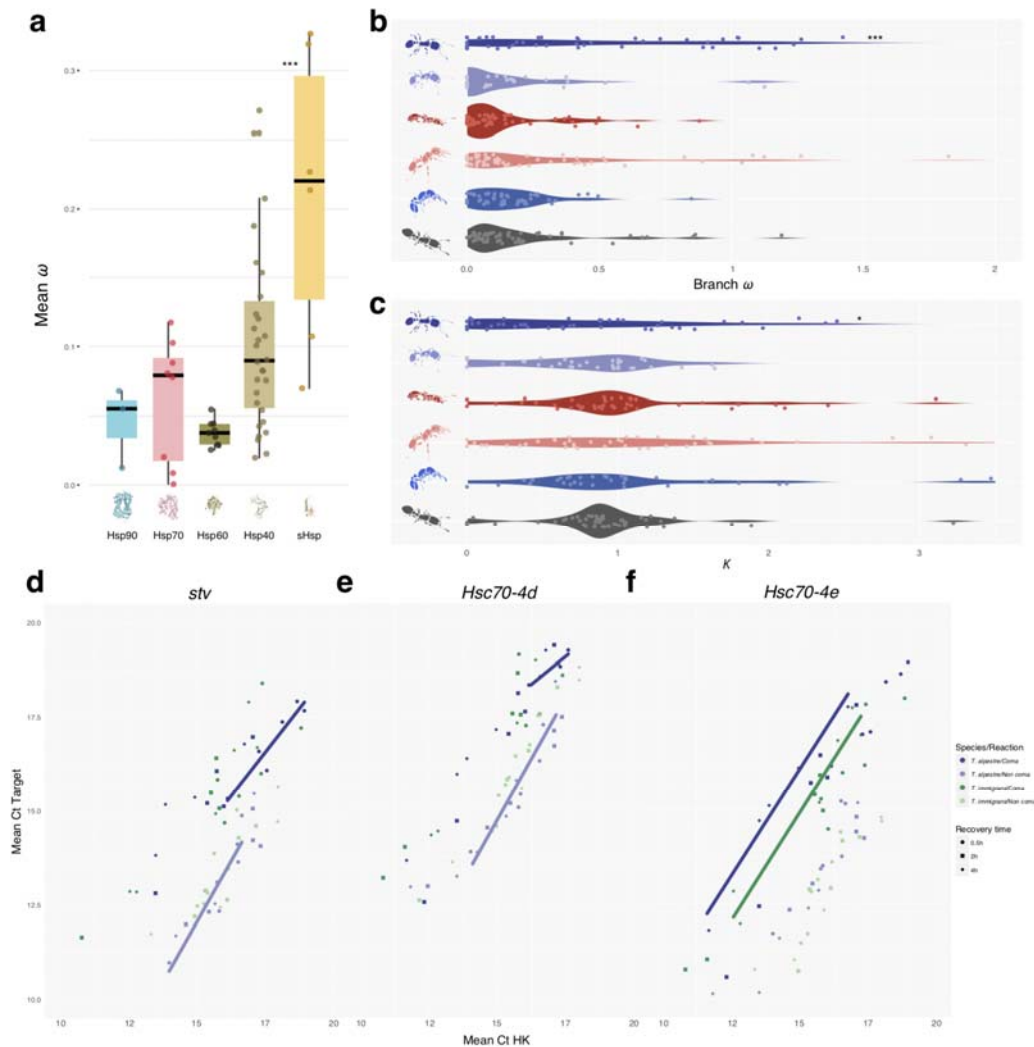

465

466 **Figure 5.** a) Boxplots showing the distribution and median (horizontal black line) of mean  $\omega$  ( $d_N/d_S$ ) rates for each  
 467 of the HSP subfamily. b) Violin plot showing the distribution of the mean  $\omega$  values; and c)  $k$  in the terminal  
 468 branches of the Crematogastrini (from up to bottom: *T. alpestre*, *T. immigrans*, *T. bicarinatum*, *T. simillimum*, *T.*  
 469 *parvispinum*, *V. emeryi*). d-f) Scatter plot of target gene (*stv*, *Hsc70-4d*, *Hsc70-4e*) vs. housekeeping gene (HK)  
 470 concentrations; concentrations given as total number of cycles minus cycle threshold (Ct) values, that is, higher  
 471 values represent higher concentrations. Straight lines are linear regressions for each target gene against HK using  
 472 the different recovery times separately; based on one-way analysis of covariance followed by correction for  
 473 multiple comparison, just lines for those treatment / recovery-time combinations are shown for which  
 474 significances for just a single species arose, that is, *T. alpestre* coma vs. non-coma after 0.5 h (d, e; no difference  
 475 in *T. immigrans*) or for which the two species differed, that is, *T. alpestre* coma vs *T. immigrans* coma after 4.0 h  
 476 (f).

477

478 showed no gene under putative diversifying positive selection, while six loci were  
479 identified to be under putative relaxing selection: one Hsp90 (*Trap1*), two Hsp60  
480 (*CCT4*, *CCT5*), and three Hsp40s (*Sec63*, *DnajC8*, *DnajC11*) ( $k < 0.14$ , adjusted  $P$ -values  
481  $< 0.005$ ). Using these genes in prediction interaction networks, we found that the  
482 two Hsp60s interacted with other 21 genes, giving 17 significant enriched functions  
483 (FDR  $< 0.05$ ), mainly related to protein folding and microtubule, spindle organization;  
484 the three Hsp40s interacted with 21 genes, giving two enriched functions (FDR  $<$   
485  $0.05$ ), related to response to heat and response to temperature stimulus (Figure  
486 S19).

487

488 **Chill shock effect, recovery times, and expression patterns of *stv* and HSPs in *T.***  
489 ***alpestre* and *T. immigrans***

490 Among the genes with a putative signature of diversifying selection, we also found  
491 *starvin* (*stv*), a BAG-family member which seems to be implicated in Hsp70 ATPase  
492 activity during cold recovery in *D. melanogaster* (Colinet and Hoffmann 2010).  
493 Therefore, we explored if the modulation of its expression may play a role in how *T.*  
494 *alpestre* differently withstands the cold compared to the related species *T.*  
495 *immigrans*. We thus performed a pilot test measuring the different expression  
496 patterns of *stv*, two paralogs of *D. melanogaster* *Hsc70-4* (*Hsc70-4d* and *Hsc70-4e*), a  
497 member of the Hsp90 subfamily (*Hsp83*), and sHsp *l(2)efl4* in the two species.

498 We measured the transcription activity of three recovery times (0.5 h, 2.0 h,  
499 and 4.0 h) and compared coma and non-coma individuals and found a significant  
500 difference in the expression patterns of *stv*, *Hsc70-4d*, *Hsc70-4e*, and *Hsp83*, but not  
501 of *l(2)efl4* (one-way ANCOVA followed by Bonferroni-Holm correction). In particular,

502 looking at the different recovery times, *stv* and *Hsc70-4d* responded quickly in *T.*  
503 *alpestre* but not in *T. immigrans*, being significantly expressed only in workers of *T.*  
504 *alpestre* after 0.5 h recovery, but not in *T. immigrans* (Figure 5d-e). Comparing the  
505 expression levels between species, we found higher mRNA levels for *Hsc70-4e* in *T.*  
506 *alpestre* after 4 h recovery (Figure 5f).

507

508

## 509 **Discussion**

510 *Tetramorium alpestre* represents a critical example of evolutionary adaptation to  
511 cold environments such as alpine habitats, characterized by low temperatures during  
512 the growing season (Figure 1c). By analyzing its genome in the context of 18 other  
513 ant species, we shed new light on the evolution and adaptation of this ant, which  
514 can serve as a potential model for arthropod adaptation to cold habitats. We found  
515 good concordance between the nuclear and the mitochondrial dated phylogenies,  
516 concerning the dating of the speciation of *T. alpestre*, which seems to have diverged  
517 from its closest relative, *T. immigrans*, between 2 and 9 mya. This period overlaps  
518 with the beginning of a new climatic zonation of the European continent during the  
519 Middle and earliest Late Miocene (Zachos et al. 2001). At the end of this period, a  
520 rapid uplift (~5 mya) fundamentally changed the paleogeographic and topographic  
521 setting of central and southern Europe and triggered Alpine glaciation (Kuhlemann  
522 2007). Interestingly, both paleoclimatic and paleogeographic changes co-occurred  
523 with the origin of the lineage leading to *T. alpestre* (Figure 1b). In fact, while these  
524 glaciations dramatically reshaped global biodiversity patterns, eliminating terrestrial  
525 biota from many mid- to high-latitude areas, they may have been the main driver of

526 diversification on highlands by reducing gene flow among populations (Wallis et al.  
527 2016).

528         The present results support our prediction that two parallel patterns will  
529 occur in the genome of species adapting to extreme habitats. The genome of *T.*  
530 *alpestre* appears to be under the influence of two strong evolutionary trajectories:  
531 on the one hand, a diversifying selective force, two-fold higher compared with all  
532 other ants, and on the other hand, a relaxation of the overall purifying selection  
533 present in other ants, identified by the skewed distribution of *k* towards zero.  
534 Specifically, the diversifying selective force affects more than a hundred genes in  
535 many key biological processes, such as those related to development, cell migration,  
536 and gastrulation. Genes under the category of biological processes are also under  
537 selection in the genome of the Antarctic midge *Belgica antarctica* (Kelley et al. 2014).  
538 In fact, early stages are the most fragile ones, having the highest rate of lethal  
539 phenotypes during heat shock and UV irradiation, particularly around gastrulation  
540 (Uchida et al. 2018). The same may pertain to genes related to cellular-level  
541 organization (e.g., spindle midzone assembly, supramolecular fiber organization,  
542 actin cytoskeleton organization), where environmental stress may jeopardise a well  
543 working cell division machinery, as SNPs associated to long-term cold-adaptation  
544 plasticity were found to be present in genes related to cytoskeletal and membrane  
545 structural components in *D. melanogaster* (Gerken et al. 2015). Among 25 genes  
546 involved in these biological processes, *polo*, a polo-like kinase which plays a central  
547 role as regulator of cell division and is required for several events of mitosis and  
548 cytokinesis (Archambault et al. 2015), shows three amino acid substitutions in



549 positions corresponding to active binding sites, and thus could be a good candidate  
550 for further studies.

551         The two evolutionary trajectories were predicted in our hypothesis, and while  
552 diversifying selection is somewhat expected in species adapting to a new  
553 environmental niche, the magnitude of relaxed selection found is more surprising  
554 and never recorded. Although both  $\omega$  and  $k$  distributions in *T. alpestre* are highly  
555 skewed, the absolute number of genes under diversifying and relaxed selection are  
556 not markedly greater than other species in similar studies (Cicconardi et al. 2017b;  
557 Roux et al. 2014; Harpur et al. 2014). This cannot be directly ascribed to the type I  
558 error rate because the same rate should be equally randomly present in all the other  
559 short or long branches of the phylogeny. Nevertheless, *T. alpestre*, as part of a  
560 species complex (Steiner et al. 2010; Wagner et al. 2017), may have more recently  
561 diverged from more closely related species not yet adapted to the alpine habitat.  
562 Magnitude of this relaxed selection is evidenced by the 70 enriched biological  
563 processes, and can be possibly seen as the consequence of a shift and/or decreased  
564 magnitude in the purifying selection. The direct implication of this relaxation is not  
565 clear, especially its effect on genes and their biological processes, such as the  
566 regulation of cellular development, signal transduction, cell communication,  
567 neurogenesis, axon development, and many others. If the physiology of cold  
568 adaptation utilises different metabolic and developmental strategies to minimise  
569 and optimise energy consumption, a new balance needs to be reached. The two  
570 patterns observed in present study (diversifying/relaxing selection) might represent  
571 this new shift. Interestingly, *T. immigrans*, which inhabit intermediate environmental  
572 conditions (Figure 1c), shows also an intermediate pattern of  $k$ , with an intriguing

573 bimodal distribution (Figure 2b). Therefore, we can speculate that the highly skewed  
574 distributions point to ongoing adaptation to a colder climate, and a relaxation of  
575 selective forces present in warmer habitats. To our knowledge, this is the first time  
576 that this effect is found in an organism, most likely due to the underrepresentation  
577 of genomic studies on alpine and cold adapted species, and, importantly, the lack of  
578 application of the RELAXED test in a genome-wise manner.

579         Examining the effect of those evolutionary trajectories, metabolism seems to  
580 be significantly involved in the sub-alpine ant's adaptation. Several clues are pointing  
581 in that direction, such as the presence of underground aphids in *T. alpestre* nests but  
582 not in those of *T. immigrans* (unpublished data), the expansion of OGs related to  
583 sugar transporters, and five enzymes under diversifying selection related to  
584 metabolism and phosphorylation of sugars. We deeply explored and validated one of  
585 these enzymes, Hex-T1, a key regulator and rate-limiting enzyme for energy (sugars)  
586 metabolism and reactive oxygen species (ROS) activity in insects (Xian-Wu and  
587 Wei-Hua 2016), by contrasting its enzymatic activity between *T. alpestre* and *T.*  
588 *immigrans*. We showed that the mutated form in *T. alpestre* is indeed overall more  
589 efficient, with less substrate needed to reach the highest reaction velocity of the  
590 enzyme, possibly due to a single amino acid mutation that enhance effect on the  
591 catalytic efficiency of the enzyme due to the formation of a more functional network  
592 of hydrogen bonds with its substrate. In fact, the path of the hydrogen bonds found  
593 in TalpHex-T1 resembled the one depicted by the X-ray solved structure of Hex-T1  
594 from (Mulichak et al. 2002), used as a template to obtain the three-dimensional  
595 coordinates of both TimHex-T1 and TalpHex-T1 (see Methods). Mulichak and  
596 colleagues identified their model residues Lys621 and Asp657 as crucial for the

597 catalytic activity of the protein; the corresponding residues TalpHex-T1<sub>K168</sub> and  
598 TalpHex-T1<sub>D204</sub> are indeed interacting, together with other residues, with glucose in  
599 TalpHex-T1 at both 6 and 26 °C. On the other hand, while the interaction with  
600 TalpHex-T1<sub>D204</sub> is conserved, the one with the lysine is lost in TimmHex-T1 and a  
601 looser protein-sugar network is formed, explaining the higher catalytic efficiency of  
602 TalpHex-T1 versus that of TimmHex-T1. We can indeed infer that the higher  
603 flexibility conferred by TalpHex-T1<sub>G74</sub> increases the shift of the residue TalpHex-  
604 T1<sub>K168</sub>, belonging to the catalytic site (Figure 4d, e), allowing it to move closer and  
605 establish a stronger interaction with glucose, possibly contributing to lower the Km  
606 of the catalytic reaction. In eco-evolutionary terms all these findings hint at a more  
607 intimate relation between *T. alpestre* and the aphids. This relationship of ants and  
608 aphids is one of the most studied mutualistic relationships in the animal kingdom.  
609 Aphids produce honeydew, and in return ants offer protection from predators,  
610 parasitoids, fungal infection and adverse conditions. Honeydew contains  
611 monosaccharides (glucose and fructose), disaccharides (maltose, sucrose), and  
612 Melezitose, a trisaccharide, that is one of the main sugar synthesized by aphids, and  
613 which has been found to attract ants and maintain the ant-aphid mutualism (Fischer  
614 and Shingleton 2001). Small amounts of amino-acids, proteins, and lipids are also  
615 present (Pringle et al. 2014). Usually, this interaction is above ground level, on plant  
616 leaves and branches, but there are cases in which ants are specialized to farm  
617 subterranean aphids, just like in *Lasius flavus* (Ivens et al. 2012). *Tetramorium*  
618 *alpestre* may have evolved the same behavior through a coevolution of physiological  
619 factors such as palatability, fluid intake rate and digestibility of sugar molecules,

620 improving the ants' survival by enhancing energy intake, a limiting factor in high-  
621 elevation ecosystems.

622         The complete annotation and characterization of the five HSP subfamilies in  
623 19 ant species show good overall conservation, and strong purifying selection was  
624 observed in most subfamilies. The exception are sHsps, which seem to be the most  
625 diversified HSP subfamily, with the highest and the widest range of  $\omega$ . It is also the  
626 only subfamily that took a different evolutionary path compared with Diptera,  
627 having very few orthologs in common with them. Given that sHsps are virtually  
628 ubiquitous molecular chaperones that can prevent the irreversible aggregation of  
629 denaturing proteins (Haslbeck and Vierling 2015), they may have played a central  
630 role in the adaptation of ants to strongly different climates and environments.  
631 Although we observe a higher distribution of  $\omega$  in *T. alpestre*, no HSPs show a  
632 significant sign of diversifying selection. Rather, six loci show relaxed purifying  
633 selection (Hsp90: *Trap1*; Hsp60: *CCT4*, *CCT5*; Hsp40: *Sec63*, *DnajC8*, *DnajC11*). The  
634 impact of the TNF receptor-associated protein (*Trap1*) on cellular bioenergetics of *T.*  
635 *alpestre* may contribute to its adaptation to cold environments by differently  
636 modulating cellular metabolism. Given that it functions as a negative regulator of  
637 mitochondrial respiration, able to modulate the balance between oxidative  
638 phosphorylation and aerobic glycolysis, possibly another form of metabolic  
639 adaptation. It has been shown that reduced or absent *Trap1* expression leads to  
640 deregulated mitochondrial respiration, that is, a high energy state characterized by  
641 elevated ATP and reactive oxygen species, an increase in mitochondrial respiration  
642 and fatty acid oxidation, and a cellular accumulation of tricarboxylic acid cycle  
643 intermediates (Yoshida et al. 2013). *Trap1* overexpression is associated with

644 increased expression of genes associated with cell proliferation (Liu et al. 2010a).  
645 Since the two Hsp60s are associated to protein folding and cytoplasmic microtubule  
646 organization, biological processes also enriched by genes under diversifying  
647 selection, this suggests profound changes in the cellular physiology of *T. alpestre*. It  
648 is also plausible that adapting to a cold environment will depress selection on genes  
649 directly related to severe heat shock. As we have shown, *T. alpestre*'s habitat is  
650 characterised by temperatures that rarely exceed 20 °C (median = 16.5 °C; 99%  
651 confidence interval = 17.8 °C), although rocky habitats may produce warmer  
652 microhabitats. This could mean that this species experienced relaxed selection for  
653 HSPs associated with the denaturation to protein folding by heat shock, as suggested  
654 by the relaxation of purifying selection on *Cct5* and the three Hsp40s associated with  
655 responses to heat and temperature stimulus.

656         Although we provide a range of evidence that adaptation to cold  
657 environments can be related to changes in protein-coding sequences, it has long  
658 been postulated that phenotypic divergence between closely related species, such as  
659 *T. alpestre* and *T. immigrans*, is primarily driven by quantitative and spatiotemporal  
660 changes in gene expression, mediated by alterations in regulatory elements (e.g.:  
661 Danko et al., 2018; Prescott et al., 2015). We tested this hypothesis by looking at the  
662 expression patterns of *stv* and four other HSPs (*Hsc70-4d*, *Hsc70-4e*, *Hsp83*, *l(2)efl4*),  
663 between *T. alpestre* and *T. immigrans*. *Stv* is a member of Bcl-2-associated  
664 athanogene (BAG)-family proteins, which interact with Hsc70s and Hsp70s, and can  
665 modulate, either positively or negatively, the functions of these chaperones (Doong  
666 et al. 2002). It is implicated in the recovery from chill shock in *D. melanogaster*  
667 during cold recovery (Colinet and Hoffmann 2010, 2012). The concerted synthesis of

668 *D. melanogaster stv* and Hsp70s suggests cooperation to offset cold injury, possibly  
669 by preserving the folding/degradation and by regulating apoptosis (Colinet and  
670 Hoffmann 2010). In our experiment, an acute cold stress (-6 °C) was used to knock  
671 down individuals. By looking at the differential expression of these genes in coma  
672 and non-coma individuals within and between species, we were not only able to  
673 show that *stv* may interact with Hsc70s, but also that *T. alpestre* has a quicker  
674 response in these genes compared with, *T. immigrans*, the related species not cold  
675 adapted. Given these results, which are in line with the selection signature we  
676 identified, it is probable that *stv* may play a similar role in the physiology of ants. As  
677 we have shown in this study, ants completely lack Hsp70s (Figure S14) and retained  
678 only the heat shock cognates (Hsc70s) with mainly two conserved paralogs (*Hsc70-*  
679 *4d* and *Hsc70-4e*), which may have evolved to function as the Dipteran Hsp70s.  
680 Although we found an interesting and promising correlation between chill shock, *stv*,  
681 and Hsc70s, it will be important to continue exploring other expression patterns in  
682 ant physiology to assess whether *stv* has tissue-specific expression patterns, as was  
683 found in *D. melanogaster* (Coulson et al. 2005), and to study its expression across  
684 different species with different ecological adaptations.

685         One of the most enduring problems of evolutionary biology is explaining how  
686 complex adaptive traits originate (Wagner and Lynch 2010). Although it is widely  
687 assumed that new traits arise solely from selection on genetic variation, many  
688 researchers ask whether phenotypic plasticity precedes and facilitates adaptation  
689 (Levis and Pfennig 2016). This alternative scenario, the plasticity-first hypothesis,  
690 states that under novel conditions, environmentally induced variation can be refined  
691 by selection and, depending on whether plasticity is favoured, become

692 developmentally canalized through genetic assimilation. Under this scenario,  
693 environmentally induced phenotypic change can precede and promote the  
694 evolutionary origins of a complex adaptive trait.

695         Four criteria have been proposed for verifying this hypothesis (Levis and  
696 Pfennig 2016): 1) the focal trait needs to be environmentally induced in the  
697 ancestral-proxy lineages; 2) cryptic genetic variation will be uncovered when  
698 ancestral-proxy lineages experience the derived environment; 3) the focal trait will  
699 exhibit evidence of having undergone an evolutionary change in its regulation, in its  
700 form, or in both in the derived lineages; and 4) the focal trait will exhibit evidence of  
701 having undergone adaptive refinement in the derived lineages. Although it is  
702 methodically difficult to prove each point, our findings on the evolution and  
703 adaptation of *T. alpestre* appear consistent with plasticity-first evolution. In more  
704 detail, *T. immigrans*, the ancestral-proxy lineage, shows considerable plasticity under  
705 variable temperature conditions compared to other ant species (Criterion 1, Figure  
706 1c), showing an ability to recover from severe chill-shocks that is almost as good as  
707 the derived lineage (*T. alpestre*), and, unexpectedly, better efficiency of Hex-t1 at  
708 lower rather than higher temperatures (Figure 4a). We suggest that the derived  
709 lineage, *T. alpestre*, underwent genetic assimilation of the cold response (Criterion  
710 3), followed by evolutionary refinement via changes in regulation, resulting, for  
711 example, in *stv* differential expression (Criterion 4). Consistent with evolutionary  
712 refinement, the derived lineage has evolved more extreme traits such as an overall  
713 improved activity of Hex-T1 with reduced variability.

714         Our comparative genomic analysis shows how natural selection could trigger  
715 complicated patterns of change in genomes, especially protein-coding sequences,

716 both in terms of diversifying selection and relaxation of purifying selection. Many of  
717 these changes are in genes that may be associated with aspects of development,  
718 either directly or through the associated complex changes in ecology and natural  
719 history, and all of these hypotheses are now open for in-depth scrutiny.  
720 Furthermore, this work identifies promising gene expression patterns that are  
721 possibly playing an important role in adaptation to new ecological niches. Overall,  
722 this study represents the first systematic attempt to provide a framework for the  
723 genomic analysis of adaptation to extreme environments and underlines the  
724 importance of studying organisms with different ecological niches in understanding  
725 the genetic basis of ecological adaptation.

726

727

## 728 ***Methods***

### 729 **Species-locality and climatic data**

730 To define the environment of *T. alpestre* and the other four *Tetramorium* species,  
731 georeferenced occurrence data were compiled and complemented with those for  
732 the native ranges of other ant species with available genomic data. Occurrence  
733 records for 17 species (Table S2) were compiled from the Global Ant Biodiversity  
734 Informatics database (GABI, Guénard et al., 2017, accessible via [www.antmaps.org](http://www.antmaps.org),  
735 Janicki et al., 2016). The species determinations in the records were evaluated by  
736 specialists in ant taxonomy, and erroneous data were excluded. Slightly incorrect  
737 coordinates (i.e. in the ocean within 8.5 km of land) were assigned to the nearest  
738 land point. Additionally, georeferenced occurrence data of two species (*T. alpestre*,  
739 *T. immigrans*) were compiled from the latest taxonomic revision (Wagner et al.



740 2017). The occurrence data of each species were spatially rarefied at a 5 km level  
741 using the R package `sPTHIN` v. 0.1.0 (Aiello-Lammens et al. 2015), to counter spatial  
742 autocorrelation and to provide some protection against sampling bias issues (Merow  
743 et al. 2013). The Bioclim variables bio1-bio19 from the `WORLDCLIM` database v. 1.4  
744 (Hijmans et al. 2005) were extracted for each unique species locality at a 2.5 arc min  
745 resolution ( $4.65 \times 4.65 = 21.6225 \text{ km}^2$  at the equator) using `ARCGIS` v. 10.4 (ESRI,  
746 Redland, CA). A Wilcoxon-Mann-Whitney rank sum test as implemented in the R  
747 package `WILCOX.TEST` (<http://www.r-project.org>) was adopted to test for differences  
748 between *T. alpestre* and the other species individually for each of the Bioclim  
749 variables. The Bonferroni-Holm sequential rejection procedure (Abdi 2010) was used  
750 to control for multiple testing.

751

### 752 **Biological sample processing, genome size estimation, and genome sequencing**

753 Six colonies of *T. alpestre* ants were sampled, two for flow cytometry (nest 18811:  
754 Penser Joch, Italy, 46.83379° N, 11.44652° E, 21 June 2016; nest 18813: Kühtai,  
755 Austria, 47.27923, 11.07590° E, 21 June 2016), three for RNA extraction (nest 18586:  
756 Zirnbachalm, Austria, 47.21920° N, 11.07530° E, 30 July 2015; nest 18590:  
757 Zirnbachalm, 47.21910° N, 11.07620° E, 30 July 2015; nest 18594: Penser Joch,  
758 46.82940°N, 11.43830° E, 2 August 2015), and one for DNA extraction (nest 18592:  
759 Penser Joch, 46.83380° N, 11.44610° E, 2 August 2015). The ants were brought alive  
760 to the laboratory (for flow cytometry) or immediately submerged in `RNAlater` (for  
761 RNA extraction) or 96% ethanol (for DNA extraction) and stored at -70 °C (RNA) or -  
762 20 °C (DNA).

763 Flow cytometry was used to estimate relative genome size from single *T.*  
764 *alpestre* worker heads, using strain ISO-1 of *Drosophila melanogaster* as internal  
765 standard (obtained from Bloomington Drosophila Stock Center, Indiana University,  
766 Bloomington, USA; nuclear DNA content: 0.35 pg, Gregory 2018). Six individuals each  
767 were measured from *T. alpestre* nests 18811 and 18813. In more detail, single *T.*  
768 *alpestre* heads and, separately, heads of 10 ISO-1 females were chopped in 500  $\mu$ L of  
769 ice-cold Otto 1 Buffer (0.1 mol/L citric acid, 0.5% Tween20 (Merck KGaA, Darmstadt,  
770 Germany)). The suspensions were filtered using 42- $\mu$ m nylon meshes and incubated  
771 for 5 min. Then, 1 mL of staining solution (DAPI (4  $\mu$ L/mL) and 2-mercaptoethanol (2  
772  $\mu$ L/mL) in Otto 2 buffer (0.4 mol/L  $\text{Na}_2\text{HPO}_4 \cdot 12 \text{H}_2\text{O}$ )) was added to each suspension.  
773 For each measurement, 200  $\mu$ L suspension of a single *T. alpestre* worker and 10  $\mu$ L of  
774 the ISO-1 standard were used. Fluorescence intensity of 3000 cell nuclei per sample  
775 was measured with a Partec CyFlow space flow cytometer (Partec GmbH, Münster,  
776 Germany). Gating and peak analysis were done automatically using the software  
777 Partec Flo Max.

778 For the DNA and RNA extractions, the individuals were thawed on ice and the  
779 gasters removed. DNA was extracted using the QIAamp DNA Micro Kit (Qiagen). The  
780 extraction followed the protocol of the manufacturer, except that 20  $\mu$ l RNase A  
781 solution (Sigma-Aldrich) was added to the vials and incubated for 5 minutes at room  
782 temperature. DNA concentration and quality were checked via Nanodrop (Thermo  
783 Scientific) and gel electrophoresis. Two adult males were used to generate the  
784 overlapping-read and the paired-end (PE) libraries, while for the mate-pair (MP)  
785 libraries, four adult females were extracted of nest 18592. RNA was extracted using  
786 the RNeasy Mini Kit (Qiagen) following the instructions of the manufacturer. Six

787 developmental stages were extracted as pools of individuals (nest 18586: worker  
788 larvae – 30 individuals, worker pupae – 40, worker adult – 50; nest 18594: gyne  
789 pupae – 2; nest 18590: gyne adult – 7, male adult – 7). RNA concentration and  
790 quality were checked via Nanodrop (Thermo Scientific) and gel electrophoresis.

791 All *T. alpestre* DNA-seq and RNA-seq Illumina libraries were prepared by  
792 IGATech (<http://igatechnology.com/>). Specifically, four libraries were used for  
793 genome sequencing of *T. alpestre*: one overlapping-reads library (insert size ~400 bp;  
794 paired-end (PE) sequencing with 2×250 bp read length), one regular PE library (insert  
795 size ~400 bp, 2×100 bp read length), and two mate pair libraries (insert size ~4 kb,  
796 2×100 bp read length) (see Table S2). For RNA-seq, six strand-specific libraries (insert  
797 size ~500 bp, 2×200 bp read length) were constructed from three stages of workers  
798 (larvae, pupae, adult), two stages of gynes (larvae and adult), and adult males. All  
799 libraries were sequenced on an Illumina HiSeq 2500 platform in standard (DNA) and  
800 RAPID (RNA) mode. For each *T. immigrans*, *T. bicarinatum*, *T. simillimum*, and *T.*  
801 *parvispinum*, one TrueSeq library (insert size ~500 bp, 2×100 bp read length) was  
802 prepared and sequenced on an Illumina HiSeq 4000 machine at OIST sequencing  
803 center.

804

### 805 **Genomic and mitogenomic assembly and gene prediction**

806 Genomic sequencing reads of *T. alpestre* were filtered to remove low-quality reads  
807 and PCR duplicates, corrected, and assembled using ALLPATHS-LG v. 52488 (Gnerre et  
808 al. 2011). Contigs were first constructed based on overlapping reads and then  
809 scaffolded using paired-end and mate-pair information from all DNA libraries. Given  
810 the high coverage of the overlapping reads, based on the estimated genome size,

811 multiple trials were performed using different coverages to establish the best  
812 combination of read coverage. The genomes of the other four related species were  
813 assembled using SPAdes v. 3.10.0 (Bankevich et al. 2012) with enabled read error  
814 correction algorithm, a kmer range of 21, 33, 55, 77, 99, and mismatch correction.  
815 Scaffolds belonging to contaminants were identified and removed using BLOBOLOGY v.  
816 2013-09-12 (Kumar et al. 2013).

817 A bioinformatic pipeline that included combinatorial approaches of  
818 homology, *ab initio*, and *de novo* methods were implemented to predict gene  
819 models. REPEATMASKER v. 4.0.6 (Smit et al. 2013) was used to generate repeat hints.  
820 For the homology-based exon hints, protein data sets of *D. melanogaster*, *Apis*  
821 *mellifera*, *Nasonia vitripennis*, and 12 ant species (see Table S1) were aligned to the  
822 *T. alpestre* genome using TBLASTN (*e*-value cut-off:  $1e^{-5}$ ) and EXONERATE v. 2.2.0  
823 (Slater and Birney 2005). As an *ab initio* procedure, the merged RNA-seq libraries  
824 were mapped using STAR v. 020201 (Dobin et al. 2013) (settings: ALIGNENDSTYPE Local;  
825 ALIGNINTRONMIN 30; ALIGNINTRONMAX 450,000; OUTSJFILTERINTRONMAXVsREADN 80 100  
826 500 1000 2000 5000 20,000; ALIGNNSJOVERHANGMIN 10; ALIGNTRANSCRIPTSPERREADNMAX  
827 100,000) to generate the splice-site position-specific scoring matrix (PSSM) and  
828 CUFFLINKS v. v2.2.1 (Trapnell et al. 2012) to generate UTR and intron hints. This  
829 information was then integrated with GENEMARK-ES v. 4 (Hoff et al. 2015) to train the  
830 analysis and use the outcome under the BRAKER1 procedure (Hoff et al. 2015) and  
831 AUGUSTUS v. 3.2.1. (Stanke et al. 2006). To avoid missing genes due to unassembled  
832 regions of the genome, previously unmapped reads were *de novo* assembled using  
833 TRINITY v. 2.2.0 (Grabherr et al. 2011) and annotated with FRAMA (Bens et al. 2016).  
834 The three results were then merged, and Benchmarking Universal Single Copy

835 Orthologs (BUSCO v. 1.2) (Simão et al. 2015) was adopted to evaluate the annotation  
836 completeness together with integrity and completeness evaluation using DELTABLAST  
837 (Boratyn et al. 2012). A visual inspection of the annotation and gene integrity was  
838 also performed on more than 250 loci.

839 All available complete ant mitochondrial genomes (mtDNA) were  
840 downloaded from GENBANK (Benson et al. 2014) (Table S1). Illumina raw SRA data of  
841 other ant species were downloaded and processed following Cicconardi et al.,  
842 (2017b). In brief, reads were quality filtered and assembled using IDBA-UD v. 1.1.1  
843 (Peng et al. 2012) and SPADES v. 3.10.0 (Bankevich et al. 2012), and annotated using  
844 MITOS v. 2 web server (Bernt et al. 2013).

845

#### 846 **Phylogenetic analysis**

847 Nuclear single-copy ortholog genes (scOGs) and complete mitochondrial genomes  
848 were used to compute the ant species tree. Once scOGs were determined (see  
849 below), single-locus trees and a species tree of concatenated scOGs were estimated  
850 using Maximum Likelihood (ML) search as implemented in FASTTREE v. 2.1.8 SSE3  
851 (Price et al. 2010). Gene trees were summarized with MP-EST (Liu et al. 2010b) using  
852 the STRAW web-server (Shaw et al. 2013).

853 For the mtDNA phylogeny, only protein-coding genes were used. Each gene  
854 was aligned using MACSE v. 1.01b (Ranwez et al. 2011), and all alignments were  
855 concatenated. The best partitions and models of evolution were identified with  
856 PARTITIONFINDER v. 1.1.1\_Mac (Lanfear et al. 2014). MtDNA trees were searched with  
857 ML and Bayesian Inference (BI) algorithms. For ML, GARLI v. 2.01.1067  
858 (<http://code.google.com/p/garli>) was used performing 20 + 5 runs from random

859 starting trees. The runs were continued until no further improvement in log-  
860 likelihood was found, followed by 1000 bootstrap pseudoreplicates. The results were  
861 summarized using SUMTREES v. 3.3.1 (<http://bit.ly/DendroPy>), using *A. mellifera*, *N.*  
862 *vitripennis*, and *D. melanogaster* as outgroups. For BI, BEAST v. 2 (Bouckaert et al.  
863 2014) was adopted to obtain the dated mtDNA tree and to estimate the divergence  
864 of the most recent common ancestors (MRCAs) (template: BEAST (Heled and  
865 Drummond 2010)). Fossil data were taken mainly from Moreau & Bell (2013) and  
866 PALEOBIO DB ([paleobiodb.org](http://paleobiodb.org)) (see Table S4 for a detailed list of references) and used  
867 as minimum calibration points constraining nodes in the topology as listed in Table  
868 S4. Lognormal prior distribution was implemented with an offset corresponding to  
869 the minimum fossil age, log(mean) of 1.0, and log(SD) of 1.0. Ten independent runs  
870 of  $8 \times 10^7$  generations were sampled every 100,000<sup>th</sup> generation. Each partition was  
871 modelled with an uncorrelated relaxed clock with a Yule process, species tree prior,  
872 and its best substitution model. Evolutionary models not implemented in BEAUTI v2  
873 (Bouckaert et al. 2014) were manually edited in the xml file. TRACER v. 1.6  
874 (<http://beast.bio.ed.ac.uk/Tracer>) was used to evaluate convergence and the  
875 parameters' effective sampling size (ESS) and a burn-in was manually implemented  
876 and roughly 10% from each run were removed. LOGCOMBINER (Bouckaert et al. 2014)  
877 and TREEANNOTATOR (Bouckaert et al. 2014) were used to summarize the results in a  
878 single consensus tree. The non-ant species were excluded from the analysis, and no  
879 outgroup was adopted. Divergence dates for the maximum-likelihood nuclear DNA  
880 (nuDNA) tree (only ants) were also inferred using the penalized likelihood approach  
881 (Sanderson 2002) implemented in the R package APE v. 5.1 (Paradis et al. 2004) by

882 calibrating four nodes: the root, the *Tetramorium*, the *Solenopsis+Monomorium*, and  
883 the Attini branches (Table S4).

884

### 885 **Functional annotation and orthologous-group dynamic evolution**

886 Genes from 19 ant and three outgroup species (Table S3) were clustered into  
887 ortholog groups (OGs) with HIERANOID v. 2 (Kaduk and Sonnhammer 2017), which  
888 implements INPARANOID v. 8 (Sonnhammer and Östlund 2015) using a guide tree  
889 topology based on Moreau & Bell (2013) and BLASTP (*e*-value cutoff of  $10^{-5}$ ) to  
890 improve the reciprocal hit accuracy (Edgar 2010), while homology relationships were  
891 searched with DELTABLAST (Boratyn et al. 2012). The functional annotation of each  
892 putative protein coding sequence was performed by identifying both the protein  
893 domain architecture and Gene Ontology (GO) terms. For each sequence, first  
894 HMMER v. 3.1b2 (HMMSCAN) (Eddy 2011) was used to predict PFAM-A v. 31.0 domains,  
895 then Domain Annotation by a Multi-objective Approach (DAMA) v. 2 (Bernardes et  
896 al. 2015) was applied to identify architectures combining scores of domain matches,  
897 previously observed multi-domain co-occurrence, and domain overlapping.  
898 Annotation of GO terms was performed as implemented in the CATH assignments  
899 for large sequence datasets (Das et al. 2015). Briefly, each input sequence was  
900 scanned against the library of CATH functional families (FUNFAMS) HMMs (Sillitoe et  
901 al. 2015) using HMMER3 (Eddy 2011) to assign FUNFAMS to regions on the query  
902 sequence (with conditional *E*-value < 0.005). Then the GO annotations for a  
903 matching FUNFAM were transferred to the query sequence with its confidence scores,  
904 calculated by considering the GO term frequency among the annotated sequences.

905 Finally, a non-redundant set of GO annotations was retained, making up the GO  
906 annotations for the query protein sequence (Sillitoe et al. 2015).

907 To identify orthologous groups specifically expanded in the *T. alpestre*  
908 genome, BADIRATE v. 1.35 (Librado et al. 2012) was performed twice, once for the  
909 nuDNA and one for the mtDNA ultrametric tree topologies, reconstructing ancestral  
910 family sizes, gain, death, and innovation (GDI), applying stochastic models and  
911 allowing estimation of the family turnover rate ( $\lambda$ ) by ML. Using this approach, we  
912 observed a correlation between the turnover rate ( $\lambda$ ) and branch lengths (Spearman  
913 correlation:  $\rho = -0.52$ ,  $P$ -value = 0), and a bimodal distribution of  $\lambda$ . We interpreted  
914 the distribution closer to 0 as background noise and therefore considered only  
915 expanded and contracted OGs with  $\lambda$  within the second distribution. The boundary  
916 between the two distributions was defined by the valley values between the two,  
917 which were computed using OPTIMIZE and APPROXFUN functions implemented in the  
918 STATS v. 3.4.0 package in R.

919

### 920 **Heat-shock protein family analysis**

921 From the functional annotation analyses of all Hymenoptera, all sequences bearing a  
922 valid protein domain matching HSPs were extracted and aligned using the CLUSTALW  
923 v.1.2.1 EBI web server (Larkin et al. 2007) (settings: MBED true; MBEDITERATION true;  
924 ITERATIONS 5; GTITERATIONS 5; HMMITERATIONS 5). A phylogenetic tree was computed  
925 using ML as implemented in FASTTREE v. 2.1.8 SSE3 (Price et al. 2010) and manually  
926 checked to identify and provisionally annotate the five main subfamily proteins  
927 (Hsp90, Hsp70, Hsp60, Hsp40, and sHsp) and their OG. Sequences falling outside  
928 clusters and with low bootstrap values were manually checked with the DELTABLAST



929 (Boratyn et al. 2012) web-server and with the CONSERVED DOMAIN DATABASE (CDD) web-  
930 server (Marchler-Bauer et al. 2017) to identify and remove bacterial contaminants  
931 and spurious/incomplete sequences. Then, nucleotide sequences belonging to each  
932 subfamily were revers translated into amino acids, aligned using CLUSTALW v.1.2.1,  
933 and the obtained protein alignment was used to derive the nucleotide one. FASTTREE  
934 was used again to compute phylogenetic trees for the five HSP subfamilies.

935

### 936 **Selection on single-copy orthologous groups and gene families**

937 All selected scOGs and HSP-OGs were scanned to evaluate selection signature on  
938 coding regions of *T. alpestre*. This was done by computing the mean  $\omega$  and the  
939 relaxation of each branch of the phylogeny of *Tetramorium* spp. + *Vollenhovia*  
940 *emeryi*. More specifically, adopting a pipeline similar to that in Cicconardi et al.  
941 (2017a, 2017b), the signatures of diversifying selection were searched in codon-  
942 based aligning groups of one-to-one orthologous ant genes with MACSE v. 1.01b  
943 (Ranwez et al. 2011), filtering with GBLOCKS v. 0.91b (Castresana 2000) under a  
944 “relaxed” condition (Parker et al. 2013; Cicconardi et al. 2017a, 2017b) and using the  
945 aBSREL algorithm as implemented in the HYPHY batch language (Kosakovsky Pond et  
946 al. 2005) using a batch script (BRANCHSITEREL) in HYPHY  
947 (<http://github.com/veg/hyphy>).

948 In parallel, the same scOGs and HSP-OGs were scanned using the RELAX test  
949 (Wertheim et al. 2014) to search for putative signals of relaxation. In brief, RELAX  
950 tests the hypothesis of evolutionary-rate relaxation in selected branches of a  
951 phylogenetic tree compared with reference branches. A  $k$  value is computed to  
952 evaluate whether the selective strength  $\omega$  shifts towards neutrality. The rate of  $d_N/d_S$

953 ( $\omega$ ) can relax ( $k < 1$ ), stay stable ( $k = 1$ ), or intensify ( $k > 1$ ). For both scOGs and HSP-  
954 OGs, and for both the ABSREL and RELAX tests, the Bonferroni-Holm sequential  
955 rejection procedure (Abdi 2010) was used to control the false discovery rate with a  
956 very stringent cutoff value of 0.005 for the adjusted  $P$ -values applied (Benjamin et al.  
957 2017). Hsp60s and Hsp40s under relaxed selection were analyzed using the  
958 GENEMANIA prediction server (Warde-Farley et al. 2010) to predict their functions by  
959 creating an interaction network with genes by including protein and genetic  
960 interactions, pathways, co-expression, co-localization, and protein domain similarity.

961 Finally, the GOSTATS package for R (Falcon and Gentleman 2007) (settings:  
962 ANNOTATION org.Dm.eg.db; CONDITIONAL TRUE; TESTDIRECTION over) was used to check  
963 for GO terms of biological processes and KEGG pathway enrichments of scOGs under  
964 selection and relaxation using the whole set of tested scOGs as background.  $P$ -values  
965  $< 0.005$  and  $< 0.05$  were implemented for GO terms and KEGG pathways,  
966 respectively.

967

### 968 **Synthesis of Hex-t1 gene and its enzyme activity assays**

969 Following identification as under diversifying selection in *T. alpestre* (see results  
970 section “Dual signature of evolutionary pressures in single-copy OGs in the *T.*  
971 *alpestre* genome”), synthesis of genes and enzymes was attempted for  
972 phosphofructokinase, transketolase, phosphoglucosemutase, and Hex-t1 was  
973 successful just for the Hex-t1. In more detail, the Hex-t1 genes of *Tetramorium*  
974 *alpestre* (1398 bp) and *T. immigrans* (1386 bp) were synthesized by ThermoFisher  
975 lifetechnologies (Carlsbad, CA, USA) and Eurofins Genomics (Ebersberg, Germany),  
976 respectively. Both constructs carried a 5' EcoRI and a 3' HindIII recognition site for

977 subsequent cloning as well as a C-terminal His-tag. The genes were excised from  
978 their carrier backbones by enzymatic digestion. The fragments were purified by  
979 agarose gel excision and sub-cloned into the pACEBac1 expression vector  
980 (MULTIBACTM, Geneva Biotech, Geneva, Switzerland). Correct insertion was verified  
981 by Sanger sequencing, and transformation into *Drosophila melanogaster* cells and  
982 protein expression followed the standard protocols of the expression vector  
983 manufacturer. After cell harvesting, the presence of the recombinant protein in the  
984 cell lysates was verified by a western blot targeting the His-tag. The relative amounts  
985 of protein were quantified from the western blot using ImageJ  
986 (<https://imagej.net/Welcome>). The cell lysates were centrifuged at 4000 rpm at 4 °C  
987 for 5 min, and the supernatant was directly used as protein source.

988 Enzyme activity assays followed a modified protocol of Crabtree &  
989 Newsholme (1972). Briefly, 1000 µl assay medium containing 75 mM Tris pH=7.5  
990 (Merck Millipore, Burlington, MA, USA), 7.5 mM MgCl<sub>2</sub> (Merck), 0.8 mM EDTA  
991 (Sigma-Aldrich, St. Louis, MO, USA), 1.5 mM KCl (Merck), 4.0 mM mercaptoethanol  
992 (Sigma), 0.4 mM NADP<sup>+</sup> (Abcam, Cambridge, UK), 2.5 mM ATP (Abcam), and 10 mM  
993 creatine phosphate (Abcam) were placed in a disposable cuvette (Brand, Germany)  
994 in a SPECORD 210 PLUS UV/VIS spectrophotometer (Analytic Jena AG, Germany)  
995 with an attached 1157P programmable thermostate (VWR, Radnor, PA, USA).  
996 Variable amounts of D-glucose (VWR) and synthetic protein were added, and the  
997 cuvette was allowed to reach the assay temperature. Then, the reaction was started  
998 by adding 15 U creatine phosphokinase (Sigma) and 5 U glucose 6-phosphahte  
999 dehydrogenase (Sigma).

1000 The Hex-t1 activity was measured in triplicate as the rate of reduction of  
1001 NADP<sup>+</sup> causing an extinction at 340 nm. Each measurement lasted for 60 s, and every  
1002 second, an extinction value was recorded. For the determination of the Michaelis-  
1003 Menten constant (Km-value) of both enzymes, assays were conducted along a  
1004 substrate gradient from 0.00167 to 24.30000 mM D-glucose, achieving saturated  
1005 extinction curves. Assay temperatures ranged from 6 °C to 36 °C with 10 K  
1006 increments. The software PRISM v. 8 (GraphPad Software, San Diego, CA, USA) was  
1007 used to calculate the Km-values.

1008

#### 1009 **Hex-t1 structure modelling and molecular dynamics simulations**

1010 The three-dimensional structures of *T. alpestre* and *T. immigrans* Hex-t1 proteins are  
1011 not available. To study the effect of the amino acid changes on the proteins'  
1012 function/dynamics, we modeled the structures of these two proteins via homology  
1013 modelling. The X-ray structure of the Hex-t1 isoform from *Schistosoma mansoni*  
1014 (Mulichak et al. 2002), solved at 2.6 Å resolution was used as a template and the  
1015 models were generated using the software MODELLER v. 9.21 (Webb and Sali 2014).  
1016 Once we obtained the models, we built the simulative systems to run molecular  
1017 dynamics simulations. The two proteins TalpHex-t1 and TimmHex-t1, in complex  
1018 with the glucose substrate, were immersed in a triclinic box filled with TIP3P water  
1019 molecules (Jorgensen et al. 1983) and rendered electroneutral by the addition of  
1020 chloride counterions. The topology of the two systems, consisting of ~ 80.000 atoms  
1021 each, was built using the AMBER14 force field (Case et al. 2014), further converted in  
1022 GROMACS v. 4.6 (Hess et al. 2008) format using ACPYPE (Sousa Da Silva and Vranken  
1023 2012). Simulations were run on a GPU cluster using GROMACS v. 4.6 with the following

1024 protocol: 1) 25000 steps of steepest descent followed by 25000 steps of conjugate  
1025 gradient minimization; 2) 5\*100 ps of equilibration runs in the NVT environment  
1026 starting at 50 K and performed by increasing the temperature of 50 K after each run  
1027 until a final value of 250 K; 3) 5\*100 ps of equilibration runs in the NPT environment  
1028 starting at 50 K and performed by increasing the temperature of 50 K after each run  
1029 until a final value of 250 K; 4) the equilibrated systems were simulated for 500 ns at  
1030 279 or 300 K, i.e. at 6 or 26 °C, for a total of four simulations and 2  $\mu$ s of sampling.  
1031 Electrostatic interactions were considered by means of the Particle Mesh Ewald  
1032 method (PME) with a cut off of 1.2 nm for the real space and Van der Waals  
1033 interactions (Darden et al. 1993). Bond lengths and angles were constrained via the  
1034 LINCS algorithm (Hess et al. 1997). The temperatures were kept constant at 279 or  
1035 300 K by using the velocity rescale with a coupling constant of 0.1 ps, and the  
1036 pressure was kept at 1 bar using the Parrinello-Rahman barostat with a coupling  
1037 constant of 1.0 ps during sampling (Parrinello and Rahman 1981). The four  
1038 trajectories were collected and comparative analyses performed with the GROMACS  
1039 suite or with in house written code.

1040

#### 1041 **Chill coma assay and quantitative qRT-PCR assay**

1042 The cold hardiness and expression of selected genes were compared between *T.*  
1043 *alpestre* and *T. immigrans* using chill coma assays. From four colonies additional to  
1044 those used for other experiments in this study, two per species, about 500 workers  
1045 per colony were collected in August 2017; *T. alpestre*: Jaufenpass (18980: 46.83791°  
1046 N, 11.29768° E) and Penser Joch (18978: 46.81402° N, 11.44198° E); *T. immigrans*:  
1047 Vienna (18977: 48.12448° N, 16.43522° E.; 18983: 48.31341° N, 16.42529° E).

1048 Workers were collected alive using aspirators, transported to the laboratory in  
1049 Innsbruck, and kept in polypropylene boxes (18.5 cm x 11 cm) with chambers of  
1050 various sizes. The walls of the boxes were Fluon-coated (GP1, De Monchy  
1051 International BV, Rotterdam, Netherlands) to prevent workers from escaping. Food  
1052 (sugar-honey-water and deep-frozen *Drosophila* flies) and tap water were provided  
1053 *ad libitum* three times a week. Workers were kept in a climate chamber (MIR-254,  
1054 Panasonic, Etten Leur, Netherlands) at a 12L:12D photoperiod at constant 18 °C. The  
1055 temperature of 18 °C was the average of the monthly mean temperatures  
1056 experienced at 200 m a.s.l. (*T. immigrans*, approx. 23.7 °C) and at 2000 m a.s.l. (*T.*  
1057 *alpestre*, approx. 12.3 °C) in July 2017. Workers were acclimatized to 18 °C for at  
1058 least three weeks before the chill coma assays.

1059         After the acclimation period, from each of the four colonies, 90 workers were  
1060 randomly chosen and divided into 18 equivalent pools, each were used for the chill  
1061 coma and for the control assays. For the chill coma assay, worker pools were  
1062 transferred into empty 5-ml glass vials, sealed, and immersed for 6.5 hours in a  
1063 water:ethane-1,2-diol mix (1:1) bath set at -6 °C; in pilot experiments, this  
1064 temperature had been determined as the highest temperature at which the ants had  
1065 fallen into chill coma after 6.5 hours exposition; the temperature was identical for  
1066 both species. Temperature was monitored using an electronic thermometer (TFX  
1067 430, ebro Electronic GmbH; Ingolstadt, Germany) with an accuracy of 0.05 °C  
1068 inserted into an additional, empty vial treated in the same way as the vials with ants.  
1069 After chill coma, the vials were transferred to a climate chamber at 18 °C, and the  
1070 workers were allowed to recover for 0.5, 2.0, and 4.0 hours. For each recovery time,  
1071 three replicate pools were used. After recovery, the workers were transferred to

1072 RNase-free reaction tubes and killed in liquid nitrogen. Tubes were stored at -70 °C.  
1073 For the control assay, worker pools were transferred to empty glass vials and placed  
1074 in the climate chamber at 18 °C. After 6.5 hours plus respective recovery time, the  
1075 workers were killed and stored as described above.

1076 For each recovery time and replicate, complete worker pools were used for  
1077 the molecular analyses. RNA was extracted using the NUCLEOSPIN® RNA Kit  
1078 (Macherey-Nagel, Düren, Germany) following the instructions of the manufacturer.  
1079 First-strand cDNA was synthesized using 200 U REVERTAID reverse transcriptase (all  
1080 reagents by Thermo Fisher Scientific, Waltham, USA), 40 U RIBOLock RNase inhibitor,  
1081 5 µM random hexamer primers, 100 µM dNTPs, and 2 µl RNA extract in a total  
1082 volume of 40 µl. The mixture was incubated for 5 min at 25 °C, 60 min at 42 °C, and 5  
1083 min at 70 °C on a UnoCycler 1200 (VWR, Radnor, USA). Quantitative PCR was  
1084 conducted on a Rotorgene Q (Qiagen) PCR system. Each reaction contained 1x  
1085 Rotor-Gene SYBR Green PCR Mastermix (Qiagen), 0.2 µM of primers, specifically  
1086 designed for target genes (Table S12), and 1 µl cDNA in a total volume of 10 µl. All  
1087 qRT-PCR reactions were performed as triplicates. Cycling conditions were 95 °C for 5  
1088 min, followed by 40 cycles of 94 °C for 15 s, 58 °C for 10 s, and 72 °C for 15 s.  
1089 Fluorescence was acquired at the end of each elongation step. PCR was followed by  
1090 a melting curve analysis from 60 to 95 °C with 0.1 °C increments held for 5 s before  
1091 fluorescence acquisition. Cycle threshold (Ct) values were subtracted from total  
1092 number of cycles. On these values, linear-regression analyses were based separately  
1093 for each target gene, treatment, recovery time, and species (in each regression  
1094 analysis, two populations and three replicate values were used, i.e., n = 6) using the  
1095 housekeeping gene as independent variable and the target gene as dependent

1096 variable. For each target gene / recovery-time combination one-way analysis of  
1097 covariance (ANCOVA) followed by Bonferroni-Holm correction was then used to  
1098 identify significant differences between treatments within species and between  
1099 species within treatment.

1100

1101

### 1102 ***Data access***

1103 The sequence data from this study have been submitted to the National Center for  
1104 Biotechnology Information (NCBI) Sequence Read Archive (SRA) under BioProject  
1105 numbers PRJNA532334, PRJNA533534, PRJNA533535, PRJNA533536 and  
1106 PRJNA533537 (<https://www.ncbi.nlm.nih.gov/bioproject/>). The mtDNA genome  
1107 assemblies have been submitted to the NCBI (GenBank accessions: MK861047 -  
1108 MK861070). All accession codes of deposited and retrieved data are provided in  
1109 Table S1.

1110

1111

### 1112 ***Acknowledgements***

1113 Philipp Andesner and Stefan Gross for valuable work in the laboratory. Research was  
1114 supported by the Austrian Science Fund (FWF, P23409, P30861). The computational  
1115 results presented here have been achieved in part by using the HPC infrastructure of  
1116 the University of Innsbruck (LEO), the Vienna Scientific Cluster (VSC), the  
1117 collaborative system of the Universities Innsbruck and Linz (MACH), and the Swiss  
1118 National Supercomputing Centre (CSCS) hosted in Lugano.



1119

1120

1121 **References**

1122 Aiello-Lammens ME, Boria RA, Radosavljevic A, Vilela B, Anderson RP. 2015. spThin:

1123 An R package for spatial thinning of species occurrence records for use in

1124 ecological niche models. *Ecography (Cop)* **38**: 541–545.

1125 Archambault V, Lépine G, Kachaner D. 2015. Understanding the Polo Kinase

1126 machine. *Oncogene* **34**: 4799–4807.

1127 Bankevich A, Nurk S, Antipov D, Gurevich A a., Dvorkin M, Kulikov AS, Lesin VM,

1128 Nikolenko SI, Pham S, Pribelski AD, et al. 2012. SPAdes: A New Genome

1129 Assembly Algorithm and Its Applications to Single-Cell Sequencing. *J Comput*

1130 *Biol* **19**: 455–477.

1131 Benjamin DJ, Berger JO, Johannesson M, Nosek BA, Wagenmakers E-J, Berk R, Bollen

1132 KA, Brembs B, Brown L, Camerer C, et al. 2017. Redefine statistical significance.

1133 *Nat Hum Behav.* <http://www.nature.com/articles/s41562-017-0189-z>.

1134 Bens M, Sahm A, Groth M, Jahn N, Morhart M, Holtze S, Hildebrandt TB, Platzer M,

1135 Szafranski K. 2016. FRAMA<sup>2</sup>: from RNA-seq data to annotated mRNA

1136 assemblies. *BMC Genomics* 1–12. [http://dx.doi.org/10.1186/s12864-015-2349-](http://dx.doi.org/10.1186/s12864-015-2349-8)

1137 8.

1138 Benson DA, Clark K, Karsch-Mizrachi I, Lipman DJ, Ostell J, Sayers EW. 2014.

1139 GenBank. *Nucleic Acids Res* **43**: D30–D35.

1140 <http://nar.oxfordjournals.org/lookup/doi/10.1093/nar/gku1216>.

1141 Bernardes JS, Vieira FRJ, Zaverucha G, Carbone A. 2015. A multi-objective

1142 optimization approach accurately resolves protein domain architectures.

- 1143 *Bioinformatics* **32**: 345–353.
- 1144 Bernt M, Donath A, Jühling F, Externbrink F, Florentz C, Fritzsch G, Pütz J,  
1145 Middendorf M, Stadler PF. 2013. MITOS: Improved de novo metazoan  
1146 mitochondrial genome annotation. *Mol Phylogenet Evol* **69**: 313–319.  
1147 <http://dx.doi.org/10.1016/j.ympev.2012.08.023>.
- 1148 Bertelsmeier C, Ollier S, Liebhold A, Keller L. 2017. Recent human history governs  
1149 global ant invasion dynamics. *Nat Ecol Evol* **1**.  
1150 <https://www.nature.com/articles/s41559-017-0184.pdf>.
- 1151 Bolton B. 2018. An online catalog of the ants of the world. Available from  
1152 <http://antcat.org>.
- 1153 Boratyn GM, Schäffer AA, Agarwala R, Altschul SF, Lipman DJ, Madden TL. 2012.  
1154 Domain enhanced lookup time accelerated BLAST. *Biol Direct* **7**: 12.  
1155 <http://www.ncbi.nlm.nih.gov/pubmed/22510480>  
1156 <http://www.pubmedcentral.nih.gov/articlerender.fcgi?artid=PMC3438057>.
- 1157 Bouckaert R, Heled J, Kühnert D, Vaughan T, Wu C-H, Xie D, Suchard M a, Rambaut A,  
1158 Drummond AJ. 2014. BEAST 2: a software platform for Bayesian evolutionary  
1159 analysis. *PLoS Comput Biol* **10**: e1003537.  
1160 <http://www.pubmedcentral.nih.gov/articlerender.fcgi?artid=3985171&tool=pm>  
1161 [centrez&rendertype=abstract](http://www.pubmedcentral.nih.gov/articlerender.fcgi?artid=3985171&tool=pmcentrez&rendertype=abstract) (Accessed May 27, 2014).
- 1162 Case DAA, Babin V, Berryman JTT, Betz RMM, Cai Q, Cerutti DSS, Cheatham TE, III,  
1163 Darden TAA, Duke REE, et al. 2014. AMBER14. *Univ California, San Fr.*
- 1164 Christian KA, Morton SR. 1992. Extreme thermophilia in a central Australian ant,  
1165 *Melophorus bagoti*. *Physiol Zool* **65**: 885–905.
- 1166 Cicconardi F, Di Marino D, Olimpieri PP, Arthofer W, Schlick-Steiner BC, Steiner FM.

- 1167           2017a. Chemosensory adaptations of the mountain fly *Drosophila nigrosarsa*  
1168           (Insecta: Diptera) through genomics' and structural biology's lenses. *Sci Rep* **7**:  
1169           43770. <http://dx.doi.org/10.1038/srep43770>.
- 1170   Cicconardi F, Marcatili P, Arthofer W, Schlick-Steiner BC, Steiner FM. 2017b. Positive  
1171           diversifying selection is a pervasive adaptive force throughout the *Drosophila*  
1172           radiation. *Mol Phylogenet Evol* **112**: 230–243.
- 1173   Clark MS, Worland MR. 2008. How insects survive the cold: molecular mechanisms—  
1174           a review. *J Comp Physiol B* **178**: 917–933.  
1175           <http://link.springer.com/10.1007/s00360-008-0286-4>.
- 1176   Colinet H, Hoffmann A. 2010. Gene and protein expression of *Drosophila* Starvin  
1177           during cold stress and recovery from chill coma. *Insect Biochem Mol Biol* **40**:  
1178           425–428. <http://dx.doi.org/10.1016/j.ibmb.2010.03.002>.
- 1179   Colinet H, Hoffmann AA. 2012. Comparing phenotypic effects and molecular  
1180           correlates of developmental, gradual and rapid cold acclimation responses in  
1181           *Drosophila melanogaster*. *Funct Ecol* **26**: 84–93.
- 1182   Coulson M, Robert S, Saint R. 2005. *Drosophila* starvin encodes a tissue-specific BAG-  
1183           domain protein required for larval food uptake. *Genetics* **171**: 1799–1812.
- 1184   Danko CG, Choate LA, Marks BA, Rice EJ, Wang Z, Chu T, Martins AL, Dukler N,  
1185           Coonrod SA, Tait Wojno ED, et al. 2018. Dynamic evolution of regulatory  
1186           element ensembles in primate CD4+ T cells. *Nat Ecol Evol* **2**.  
1187           <http://www.nature.com/articles/s41559-017-0447-5>.
- 1188   Darden T, York D, Pedersen L. 1993. Particle mesh Ewald: An N·log(N) method for  
1189           Ewald sums in large systems. *J Chem Phys*.
- 1190   Das S, Sillitoe I, Lee D, Lees JG, Dawson NL, Ward J, Orengo CA. 2015. CATH

1191 FunFHMMer web server: Protein functional annotations using functional family  
1192 assignments. *Nucleic Acids Res* **43**: W148–W153.

1193 Dobin A, Davis C a, Schlesinger F, Drenkow J, Zaleski C, Jha S, Batut P, Chaisson M,  
1194 Gingeras TR. 2013. STAR: ultrafast universal RNA-seq aligner. *Bioinformatics* **29**:  
1195 15–21.  
1196 [http://www.pubmedcentral.nih.gov/articlerender.fcgi?artid=3530905&tool=pm](http://www.pubmedcentral.nih.gov/articlerender.fcgi?artid=3530905&tool=pmcentrez&rendertype=abstract)  
1197 [centrez&rendertype=abstract](http://www.pubmedcentral.nih.gov/articlerender.fcgi?artid=3530905&tool=pmcentrez&rendertype=abstract).

1198 Doong H, Vrailas A, Kohn EC. 2002. What’s in the “BAG”? - A functional domain  
1199 analysis of the BAG-family proteins. *Cancer Lett* **188**: 25–32.

1200 Eddy SR. 2011. Accelerated profile HMM searches. *PLoS Comput Biol* **7**.

1201 Edgar RC. 2010. Search and clustering orders of magnitude faster than BLAST.  
1202 *Bioinformatics* **26**: 2460–2461.

1203 Falcon S, Gentleman R. 2007. Using GOstats to test gene lists for GO term  
1204 association. *Bioinformatics* **23**: 257–258.

1205 Fischer MK, Shingleton AW. 2001. Host plant and ants influence the honeydew  
1206 sugar. *Funct Ecol* **15**: 544–550.

1207 Gerken AR, Eller OC, Hahn D a, Morgan TJ. 2015. Constraints, independence, and  
1208 evolution of thermal plasticity: Probing genetic architecture of long- and short-  
1209 term thermal acclimation. *Proc Natl Acad Sci U S A* **112**: 4399–404.  
1210 <http://www.ncbi.nlm.nih.gov/pubmed/25805817>.

1211 Gnerre S, Maccallum I, Przybylski D, Ribeiro FJ, Burton JN, Walker BJ, Sharpe T, Hall  
1212 G, Shea TP, Sykes S, et al. 2011. High-quality draft assemblies of mammalian  
1213 genomes from massively parallel sequence data. *Proc Natl Acad Sci U S A* **108**:  
1214 1513–1518.

- 1215 Grabherr MG, Haas BJ, Yassour M, Levin JZ, Thompson D a, Amit I, Adiconis X, Fan L,  
1216 Raychowdhury R, Zeng Q, et al. 2011. Full-length transcriptome assembly from  
1217 RNA-Seq data without a reference genome. *Nat Biotechnol* **29**: 644–52.  
1218 [http://www.pubmedcentral.nih.gov/articlerender.fcgi?artid=3571712&tool=pm](http://www.pubmedcentral.nih.gov/articlerender.fcgi?artid=3571712&tool=pmcentrez&rendertype=abstract)  
1219 [centrez&rendertype=abstract](http://www.pubmedcentral.nih.gov/articlerender.fcgi?artid=3571712&tool=pmcentrez&rendertype=abstract) (Accessed March 19, 2014).
- 1220 Guénard B, Weiser MD, Gómez K, Narula N, Economo EP. 2017. The Global Ant  
1221 Biodiversity Informatics (GABI) database: Synthesizing data on the geographic  
1222 distribution of ant species (Hymenoptera: Formicidae). *Myrmecological News*  
1223 **24**: 83–89.
- 1224 Harpur BA, Kent CF, Molodtsova D, Lebon JMD, Alqarni AS, Owayss AA, Zayed A.  
1225 2014. Population genomics of the honey bee reveals strong signatures of  
1226 positive selection on worker traits. *Proc Natl Acad Sci* **111**: 2614–2619.  
1227 <http://www.pnas.org/cgi/doi/10.1073/pnas.1315506111>.
- 1228 Haslbeck M, Vierling E. 2015. A first line of stress defense: Small heat shock proteins  
1229 and their function in protein homeostasis. *J Mol Biol* **427**: 1537–1548.  
1230 <http://dx.doi.org/10.1016/j.jmb.2015.02.002>.
- 1231 Heled J, Drummond AJ. 2010. Bayesian inference of species trees from multilocus  
1232 data. *Mol Biol Evol* **27**: 570–80.  
1233 [http://www.pubmedcentral.nih.gov/articlerender.fcgi?artid=2822290&tool=pm](http://www.pubmedcentral.nih.gov/articlerender.fcgi?artid=2822290&tool=pmcentrez&rendertype=abstract)  
1234 [centrez&rendertype=abstract](http://www.pubmedcentral.nih.gov/articlerender.fcgi?artid=2822290&tool=pmcentrez&rendertype=abstract) (Accessed February 29, 2012).
- 1235 Hess B, Bekker H, Berendsen HJC, Fraaije JGEM. 1997. LINCS: A Linear Constraint  
1236 Solver for molecular simulations. *J Comput Chem*.
- 1237 Hess B, Kutzner C, Van Der Spoel D, Lindahl E. 2008. GRGMACS 4: Algorithms for  
1238 highly efficient, load-balanced, and scalable molecular simulation. *J Chem*

- 1239        *Theory Comput.*
- 1240    Hijmans RJ, Cameron SE, Parra JL, Jones PG, Jarvis A. 2005. Very high resolution  
1241        interpolated climate surfaces for global land areas. *Int J Climatol* **25**: 1965–  
1242        1978.
- 1243    Hoff KJ, Lange S, Lomsadze A, Borodovsky M, Stanke M. 2015. BRAKER1:  
1244        Unsupervised RNA-Seq-based genome annotation with GeneMark-ET and  
1245        AUGUSTUS. *Bioinformatics* **32**: 767–769.
- 1246    Hölldobler B, Wilson EO. 1990. *The Ants*.
- 1247    Holt RD. 2009. Bringing the Hutchinsonian niche into the 21st century: Ecological and  
1248        evolutionary perspectives. *Proc Natl Acad Sci* **106**: 19659–19665.  
1249        <http://www.pnas.org/cgi/doi/10.1073/pnas.0905137106>.
- 1250    Ivens ABF, Kronauer DJC, Pen I, Weissing FJ, Boomsma JJ. 2012. Ants farm  
1251        subterranean aphids mostly in single clone groups - An example of prudent  
1252        husbandry for carbohydrates and proteins? *BMC Evol Biol* **12**.
- 1253    Janicki J, Narula N, Ziegler M, Guénard B, Economo EP. 2016. Visualizing and  
1254        interacting with large-volume biodiversity data using client-server web-mapping  
1255        applications: The design and implementation of antmaps.org. *Ecol Inform* **32**:  
1256        185–193.
- 1257    Jayakumar PC, Shouche YS, Patole MS. 2007. Functional analysis of *Drosophila*  
1258        *melanogaster* hexokinase Hex-A locus: multiple Initiator-like elements  
1259        enhance DPE containing promoter activity. **16**: 3–13.
- 1260    Jorgensen WL, Chandrasekhar J, Madura JD, Impey RW, Klein ML. 1983. Comparison  
1261        of simple potential functions for simulating liquid water. *J Chem Phys*.
- 1262    Kaduk M, Sonnhammer E. 2017. Improved orthology inference with Hieranoid 2.

- 1263 *Bioinformatics* **5**: btw774.
- 1264 <http://bioinformatics.oxfordjournals.org/lookup/doi/10.1093/bioinformatics/bt>
- 1265 [w774](http://bioinformatics.oxfordjournals.org/lookup/doi/10.1093/bioinformatics/btw774).
- 1266 Keeling CI, Yuen MM, Liao NY, Roderick Docking T, Chan SK, Taylor G a, Palmquist DL,
- 1267 Jackman SD, Nguyen A, Li M, et al. 2013. Draft genome of the mountain pine
- 1268 beetle, *Dendroctonus ponderosae* Hopkins, a major forest pest. *Genome Biol*
- 1269 **14**: R27.
- 1270 <http://www.pubmedcentral.nih.gov/articlerender.fcgi?artid=4053930&tool=pm>
- 1271 [centrez&rendertype=abstract](http://www.pubmedcentral.nih.gov/articlerender.fcgi?artid=4053930&tool=pmcentrez&rendertype=abstract).
- 1272 Kelley JL, Peyton JT, Fiston-Lavier A-S, Teets NM, Yee M-C, Johnston JS, Bustamante
- 1273 CD, Lee RE, Denlinger DL. 2014. Compact genome of the Antarctic midge is likely
- 1274 an adaptation to an extreme environment. *Nat Commun* **5**: 4611.
- 1275 <http://www.nature.com/ncomms/2014/140812/ncomms5611/full/ncomms5611>
- 1276 [1.html](http://www.nature.com/ncomms/2014/140812/ncomms5611/full/ncomms5611).
- 1277 Körner C, Paulsen J, Spehn EM. 2011. A definition of mountains and their bioclimatic
- 1278 belts for global comparisons of biodiversity data. *Alp Bot* **121**: 73–78.
- 1279 Kosakovsky Pond SL, Frost SDW, Muse S V. 2005. HyPhy: Hypothesis testing using
- 1280 phylogenies. *Bioinformatics* **21**: 676–679.
- 1281 Krapf P, Russo L, Arthofer W, Möst M, Steiner FM, Schlick-Steiner BC. 2018. An
- 1282 Alpine ant's behavioural polymorphism: monogyny with and without interest
- 1283 aggression in *Tetramorium alpestre*. *Ethol Ecol Evol* **30**: 220–234.
- 1284 <https://www.tandfonline.com/doi/full/10.1080/03949370.2017.1343868>.
- 1285 Kuhlemann J. 2007. Paleogeographic and paleotopographic evolution of the Swiss
- 1286 and Eastern Alps since the Oligocene. *Glob Planet Change* **58**: 224–236.

- 1287 Kumar S, Jones M, Koutsovoulos G, Clarke M, Blaxter M. 2013. Blobology: exploring  
1288 raw genome data for contaminants, symbionts and parasites using taxon-  
1289 annotated GC-coverage plots. *Front Genet* **4**: 237.  
1290 [http://www.pubmedcentral.nih.gov/articlerender.fcgi?artid=3843372&tool=pm](http://www.pubmedcentral.nih.gov/articlerender.fcgi?artid=3843372&tool=pmcentrez&rendertype=abstract)  
1291 [centrez&rendertype=abstract](http://www.pubmedcentral.nih.gov/articlerender.fcgi?artid=3843372&tool=pmcentrez&rendertype=abstract).
- 1292 Lamprecht A, Semenchuk PR, Steinbauer K, Winkler M, Pauli H. 2018. Climate change  
1293 leads to accelerated transformation of high-elevation vegetation in the central  
1294 Alps. *New Phytol* **447**–459. <http://doi.wiley.com/10.1111/nph.15290>.
- 1295 Lanfear R, Calcott B, Kainer D, Mayer C, Stamatakis A. 2014. Selecting optimal  
1296 partitioning schemes for phylogenomic datasets. *BMC Evol Biol* **14**: 82.  
1297 <http://www.biomedcentral.com/1471-2148/14/82>.
- 1298 Larkin M a., Blackshields G, Brown NP, Chenna R, Mcgettigan P a., McWilliam H,  
1299 Valentin F, Wallace IM, Wilm a., Lopez R, et al. 2007. Clustal W and Clustal X  
1300 version 2.0. *Bioinformatics* **23**: 2947–2948.
- 1301 Levis NA, Pfennig DW. 2016. Evaluating ‘ Plasticity-First ’ Evolution in Nature: Key  
1302 Criteria and Empirical Approaches. *Trends Ecol Evol* **31**: 563–574.  
1303 <http://dx.doi.org/10.1016/j.tree.2016.03.012>.
- 1304 Librado P, Vieira FG, Rozas J. 2012. BadiRate: Estimating family turnover rates by  
1305 likelihood-based methods. *Bioinformatics* **28**: 279–281.
- 1306 Liu C, Guénard B, Garcia FH, Yamane S, Blanchard B, Yang DR, Economo E. 2015. New  
1307 records of ant species from Yunnan, China. *Zookeys* **78**: 17–78.
- 1308 Liu D, Hu J, Agorreta J, Cesario A, Zhang Y, Harris AL, Gatter K, Pezzella F. 2010a.  
1309 Tumor necrosis factor receptor-associated protein 1(TRAP1) regulates genes  
1310 involved in cell cycle and metastases. *Cancer Lett* **296**: 194–205.



- 1311 Liu L, Yu L, Edwards S V. 2010b. A maximum pseudo-likelihood approach for  
1312 estimating species trees under the coalescent model. *BMC Evol Biol* **10**: 302.  
1313 [http://www.biomedcentral.com/1471-](http://www.biomedcentral.com/1471-2148/10/302)  
1314 [2148/10/302](http://www.biomedcentral.com/1471-2148/10/302)[http://www.pubmedcentral.nih.gov/articlerender.fcgi?artid=](http://www.pubmedcentral.nih.gov/articlerender.fcgi?artid=2976751&tool=pmcentrez&rendertype=abstract)  
1315 [2976751&tool=pmcentrez&rendertype=abstract](http://www.pubmedcentral.nih.gov/articlerender.fcgi?artid=2976751&tool=pmcentrez&rendertype=abstract).
- 1316 Macdonald HC, Cunha L, Bruford MW, Florestas E, Macdonald HC, Sir T, Evans M,  
1317 Avenue M. 2016. Development of genomic resources for four potential  
1318 environmental bioindicator species: *Isoperla grammatica*, *Amphinemura*  
1319 *sulcicollis*, *Oniscus asellus* and *Baetis rhodani*. *bioRxiv*org.
- 1320 Marchler-Bauer A, Bo Y, Han L, He J, Lanczycki CJ, Lu S, Chitsaz F, Derbyshire MK,  
1321 Geer RC, Gonzales NR, et al. 2017. CDD/SPARCLE: Functional classification of  
1322 proteins via subfamily domain architectures. *Nucleic Acids Res* **45**: D200–D203.
- 1323 Merow C, Smith MJ, Silander JA. 2013. A practical guide to MaxEnt for modeling  
1324 species' distributions: What it does, and why inputs and settings matter.  
1325 *Ecography (Cop)* **36**: 1058–1069.
- 1326 Moreau CS, Bell CD. 2013. Testing The Museum Versus Cradle Tropical Biological  
1327 Diversity Hypothesis: Phylogeny, Diversification, And Ancestral Biogeographic  
1328 Range Evolution Of The Ants. *Evolution (N Y)* **67**: 2240–2257.
- 1329 Mulichak AM, Wilson JE, Padmanabhan K, Garavito RM. 2002. The structure of  
1330 mammalian hexokinase-1. *Nat Struct Biol*.
- 1331 Nguyen AD, Gotelli NJ, Cahan SH. 2016. The evolution of heat shock protein  
1332 sequences, cis-regulatory elements, and expression profiles in the eusocial  
1333 Hymenoptera. *BMC Evol Biol* **16**: 15. [http://www.biomedcentral.com/1471-](http://www.biomedcentral.com/1471-2148/16/15)  
1334 [2148/16/15](http://www.biomedcentral.com/1471-2148/16/15).

- 1335 Nygaard S, Hu H, Li C, Schiøtt M, Chen Z, Yang Z, Xie Q, Ma C, Deng Y, Dikow R, et al.  
1336 2016. Reciprocal genomic evolution in the ant-fungus agricultural symbiosis.  
1337 *Nat Commun* 1–9.
- 1338 Paradis E, Claude J, Strimmer K. 2004. APE: Analyses of phylogenetics and evolution  
1339 in R language. *Bioinformatics* **20**: 289–290.
- 1340 Parker DJ, Wiberg RAW, Trivedi U, Tyukmaeva VI, Gharbi K, Butlin RK, Hoikkala A,  
1341 Kankare M, Ritchie MG. 2018. Inter and Intraspecific Genomic Divergence in  
1342 *Drosophila montana* Shows Evidence for Cold Adaptation. **10**: 2086–2101.
- 1343 Parker J, Tsagkogeorga G, Cotton J a, Liu Y, Provero P, Stupka E, Rossiter SJ. 2013.  
1344 Genome-wide signatures of convergent evolution in echolocating mammals.  
1345 *Nature* **502**: 1–9.  
1346 <http://dx.doi.org/10.1038/nature12511>  
1347 [8/nature12511](http://dx.doi.org/10.1038/nature12511).
- 1348 Parrinello M, Rahman A. 1981. Polymorphic transitions in single crystals: A new  
1349 molecular dynamics method. *J Appl Phys*.
- 1350 Peng Y, Leung HCM, Yiu SM, Chin FYL. 2012. IDBA-UD: a *de novo* assembler for  
1351 single-cell and metagenomic sequencing data with highly uneven depth.  
1352 *Bioinformatics* **28**: 1420–1428.  
1353 <http://www.ncbi.nlm.nih.gov/pubmed/22495754> (Accessed July 24, 2014).
- 1354 Prescott SL, Srinivasan R, Marchetto MC, Grishina I, Narvaiza I, Selleri L, Gage FH,  
1355 Swigut T, Wysocka J. 2015. Enhancer Divergence and cis-Regulatory Evolution in  
1356 the Human and Chimp Neural Crest. *Cell* **163**: 68–84.
- 1357 Price MN, Dehal PS, Arkin AP. 2010. FastTree 2 - Approximately maximum-likelihood  
1358 trees for large alignments. *PLoS One* **5**: e9490.

- 1359 Pringle EG, Novo A, Ableson I, Barbehenn R V, Vannette RL. 2014. Plant-derived  
1360 differences in the composition of aphid honeydew and their effects on colonies  
1361 of aphid-tending ants.
- 1362 Ranwez V, Harispe S, Delsuc F, Douzery EJP. 2011. MACSE: Multiple alignment of  
1363 coding SEquences accounting for frameshifts and stop codons. *PLoS One* **6**:  
1364 e22594.
- 1365 Rogora M, Frate L, Carranza ML, Freppaz M, Stanisci A, Bertani I, Bottarin R,  
1366 Brambilla A, Canullo R, Carbognani M, et al. 2018. Assessment of climate  
1367 change effects on mountain ecosystems through a cross-site analysis in the Alps  
1368 and Apennines. *Sci Total Environ* **624**: 1429–1442.  
1369 <https://doi.org/10.1016/j.scitotenv.2017.12.155>.
- 1370 Roux J, Privman E, Moretti S, Daub JT, Robinson-Rechavi M, Keller L. 2014. Patterns  
1371 of positive selection in seven ant genomes. *Mol Biol Evol* **31**: 1661–1685.
- 1372 Sanderson MJ. 2002. Estimating absolute rates of molecular evolution and  
1373 divergence times: a penalized likelihood approach. *Mol Biol Evol* **19**: 101–109.  
1374 <http://www.ncbi.nlm.nih.gov/pubmed/11752195>.
- 1375 Seifert B. 2018. *The ants of Central and North Europe*. ed. Tauer. Lutra Verlags- und  
1376 Vertriebsgesellschaft.
- 1377 Shaw TI, Ruan Z, Glenn TC, Liu L. 2013. STRAW: Species TRee Analysis Web server.  
1378 *Nucleic Acids Res* **41**: 238–241.
- 1379 Sillitoe I, Lewis TE, Cuff A, Das S, Ashford P, Dawson NL, Furnham N, Laskowski RA,  
1380 Lee D, Lees JG, et al. 2015. CATH: Comprehensive structural and functional  
1381 annotations for genome sequences. *Nucleic Acids Res* **43**: D376–D381.
- 1382 Simão FA, Waterhouse RM, Ioannidis P, Kriventseva E V., Zdobnov EM. 2015. BUSCO:

- 1383           Assessing genome assembly and annotation completeness with single-copy  
1384           orthologs. *Bioinformatics* **31**: 3210–3212.
- 1385   Slater GSC, Birney E. 2005. Automated generation of heuristics for biological  
1386           sequence comparison. *BMC Bioinformatics* **6**: 1–11.
- 1387   Smit A, Hubley R, Green P. 2013. RepeatMasker Open-4.0. 2013-2015 .  
1388           <http://www.repeatmasker.org>. <http://repeatmasker.org>.
- 1389   Soberón J. 2007. Grinnellian and Eltonian niches and geographic distributions of  
1390           species. *Ecol Lett* **10**: 1115–1123.
- 1391   Sonnhammer ELL, Östlund G. 2015. InParanoid 8: Orthology analysis between 273  
1392           proteomes, mostly eukaryotic. *Nucleic Acids Res* **43**: D234–D239.
- 1393   Sousa Da Silva AW, Vranken WF. 2012. ACPYPE - AnteChamber PYthon Parser  
1394           interfacE. *BMC Res Notes*.
- 1395   Stanke M, Schöffmann O, Morgenstern B, Waack S. 2006. Gene prediction in  
1396           eukaryotes with a generalized hidden Markov model that uses hints from  
1397           external sources. *BMC Bioinformatics* **7**: 62.
- 1398   Steiner FM, Seifert B, Moder K, Schlick-Steiner BC. 2010. A multisource solution for a  
1399           complex problem in biodiversity research: Description of the cryptic ant species  
1400           Tetramorium alpestre sp.n. (Hymenoptera: Formicidae). *Zool Anzeiger - A J*  
1401           *Comp Zool* **249**: 223–254.  
1402           <http://linkinghub.elsevier.com/retrieve/pii/S0044523110000537> (Accessed  
1403           April 9, 2014).
- 1404   Trapnell C, Roberts A, Goff L, Pertea G, Kim D, Kelley DR, Pimentel H, Salzberg SL,  
1405           Rinn JL, Pachter L. 2012. Differential gene and transcript expression analysis of  
1406           RNA-seq experiments with TopHat and Cufflinks. *Nat Protoc* **7**: 562–578.

- 1407 <http://www.nature.com/doi/10.1038/nprot.2012.016> (Accessed March 1,  
1408 2012).
- 1409 Uchida Y, Uesaka M, Yamamoto T, Takeda H, Irie N. 2018. Embryonic lethality is not  
1410 sufficient to explain hourglass-like conservation of vertebrate embryos. *Evodevo*  
1411 **9**: 1–11. <https://doi.org/10.1186/s13227-018-0095-0>.
- 1412 Wagner GP, Lynch VJ. 2010. Evolutionary novelties. *Curr Biol* **20**: 48–52.  
1413 [https://pdf.sciencedirectassets.com/272099/1-s2.0-S0960982210X00021/1-  
1414 s2.0-S0960982209019459/main.pdf?x-amz-security-  
1415 token=AgoJb3JpZ2luX2VjEClacXVzLWVhc3QtMSJHMEUCIDsUh2jRKJL1EeOiMrN  
1416 glWa%2BljWFLis7tEu%2FF65JtK%2FrAiEA3Ge%2FEhYUyff41nONLuT%2F6f3OMY  
1417 i9qUIAiE](https://pdf.sciencedirectassets.com/272099/1-s2.0-S0960982210X00021/1-s2.0-S0960982209019459/main.pdf?x-amz-security-token=AgoJb3JpZ2luX2VjEClacXVzLWVhc3QtMSJHMEUCIDsUh2jRKJL1EeOiMrNglWa%2BljWFLis7tEu%2FF65JtK%2FrAiEA3Ge%2FEhYUyff41nONLuT%2F6f3OMYi9qUIAiE).
- 1418 Wagner HC, Arthofer W, Seifert B, Muster C, Steiner FM, Schlick-Steiner BC. 2017.  
1419 Light at the end of the tunnel: Integrative taxonomy delimits cryptic species in  
1420 the *Tetramorium caespitum* complex (Hymenoptera: Formicidae).  
1421 *Myrmecological News* **25**: 95–129.
- 1422 Wallis GP, Waters JM, Upton P, Craw D. 2016. Transverse Alpine Speciation Driven by  
1423 Glaciation. *Trends Ecol Evol* **31**: 916–926.  
1424 <http://dx.doi.org/10.1016/j.tree.2016.08.009>.
- 1425 Warde-Farley D, Donaldson SL, Comes O, Zuberi K, Badrawi R, Chao P, Franz M,  
1426 Grouios C, Kazi F, Lopes CT, et al. 2010. The GeneMANIA prediction server:  
1427 biological network integration for gene prioritization and predicting gene  
1428 function eds. J. Weaver, K. Anija, and T. Daspit. *Nucleic Acids Res* **38**: W214–  
1429 W220. [http://nar.oxfordjournals.org/content/38/suppl\\_2/W214.short](http://nar.oxfordjournals.org/content/38/suppl_2/W214.short)  
1430 (Accessed March 1, 2013).

- 1431 Webb B, Sali A. 2014. Protein structure modeling with MODELLER. *Methods Mol Biol*  
1432 **1137**: 1–15.  
1433 [http://www.springerlink.com/openurl.asp?genre=book&id=doi:10.1385/1592593682%5Cnhttp://link.springer.com/10.1007/978-1-4939-0366-5%5Cnhttp://link.springer.com/protocol/10.1007/978-1-60327-058-8\\_8%5Cnhttp://www.ncbi.nlm.nih.gov/pubmed/24573470](http://www.springerlink.com/openurl.asp?genre=book&id=doi:10.1385/1592593682%5Cnhttp://link.springer.com/10.1007/978-1-4939-0366-5%5Cnhttp://link.springer.com/protocol/10.1007/978-1-60327-058-8_8%5Cnhttp://www.ncbi.nlm.nih.gov/pubmed/24573470).  
1437 Wertheim JO, Murrell B, Smith MD, Kosakovsky Pond SL, Scheffler K. 2014. RELAX:  
1438 Detecting relaxed selection in a phylogenetic framework. *Mol Biol Evol* **32**: 1–  
1439 13. <http://www.ncbi.nlm.nih.gov/pubmed/25540451>.  
1440 Wilson EO. 1990. *Success and Dominance in Ecosystems: The Case of Social Insects*.  
1441 Xian-Wu L, Wei-Hua X. 2016. Hexokinase is a key regulator of energy metabolism and  
1442 ROS activity in insect lifespan extension. *Aging (Albany NY)* **8**: 245–258.  
1443 [https://www.ncbi.nlm.nih.gov/pmc/articles/PMC4789580/pdf/aging-08-](https://www.ncbi.nlm.nih.gov/pmc/articles/PMC4789580/pdf/aging-08-245.pdf)  
1444 [245.pdf](https://www.ncbi.nlm.nih.gov/pmc/articles/PMC4789580/pdf/aging-08-245.pdf).  
1445 Yoshida S, Tsutsumi S, Muhlebach G, Sourbier C, Lee M-J, Lee S, Vartholomaiou E,  
1446 Tatokoro M, Beebe K, Miyajima N, et al. 2013. Molecular chaperone TRAP1  
1447 regulates a metabolic switch between mitochondrial respiration and aerobic  
1448 glycolysis. *Proc Natl Acad Sci* **110**: E1604–E1612.  
1449 <http://www.pnas.org/cgi/doi/10.1073/pnas.1220659110>.  
1450 Zachos J, Pagani M, Sloan L, Thomas E, Billups K. 2001. Trends, Rythms, and  
1451 Aberration in Global Climate 65 Ma to Present. *Science (80- )* **292**: 686–693.  
1452
